# Supplementary material for: Sildenafil improves hippocampal brain injuries and restores neuronal development after neonatal hypoxia–ischemia in male rat pups
Source: PubMed Central journal article supplement (PMC8586032; doi:10.1038/s41598-021-01097-6), 2021-11-11
Supplement: 41598_2021_1097_MOESM1_ESM.pdf [file 41598_2021_1097_MOESM1_ESM.pdf]

Sox2

**P12**

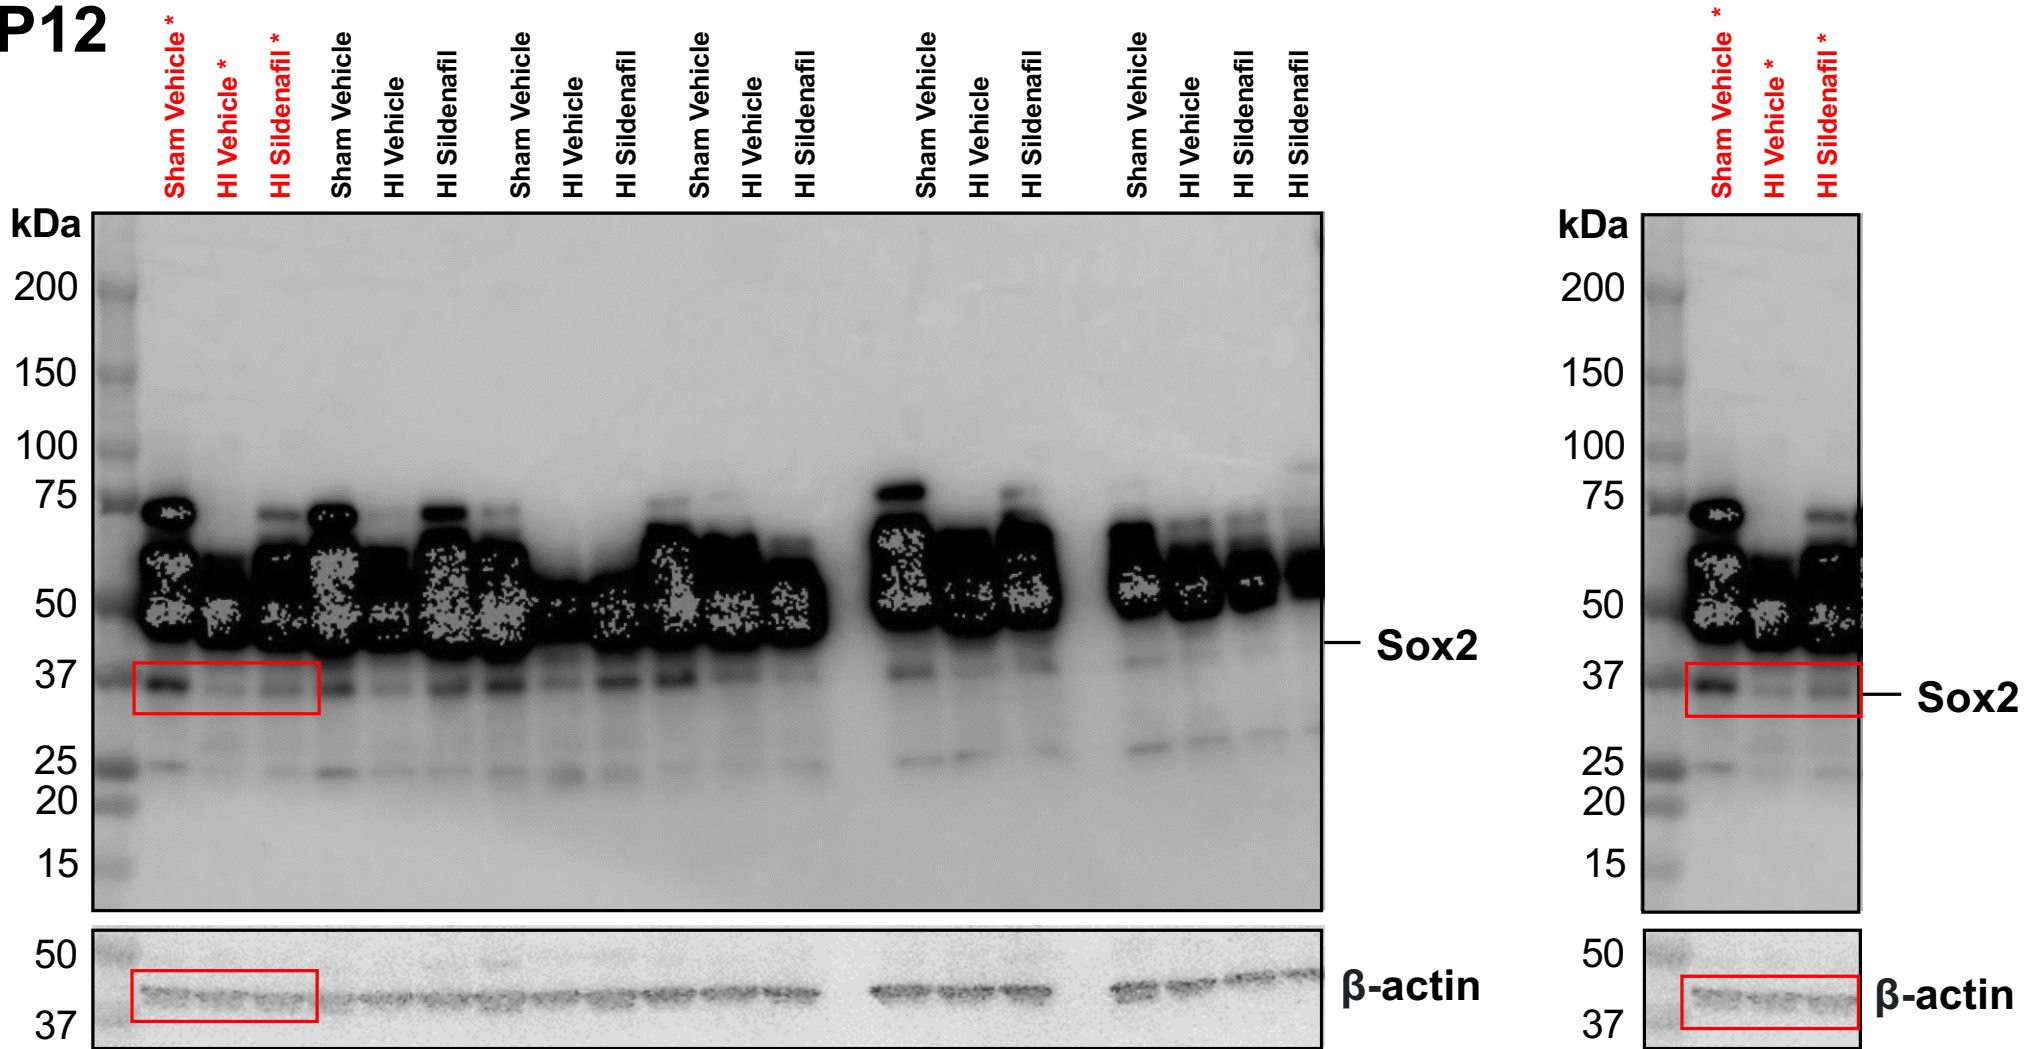

**FIGURE 3A – P12: Western blotting for Sox2 at P12, showing full-length western blots (on left panel) and representative samples chosen to be cropped for main Figure 3 (on right panel). The regions of the original blots used in main figure have been denoted using red boxes.**

# P17

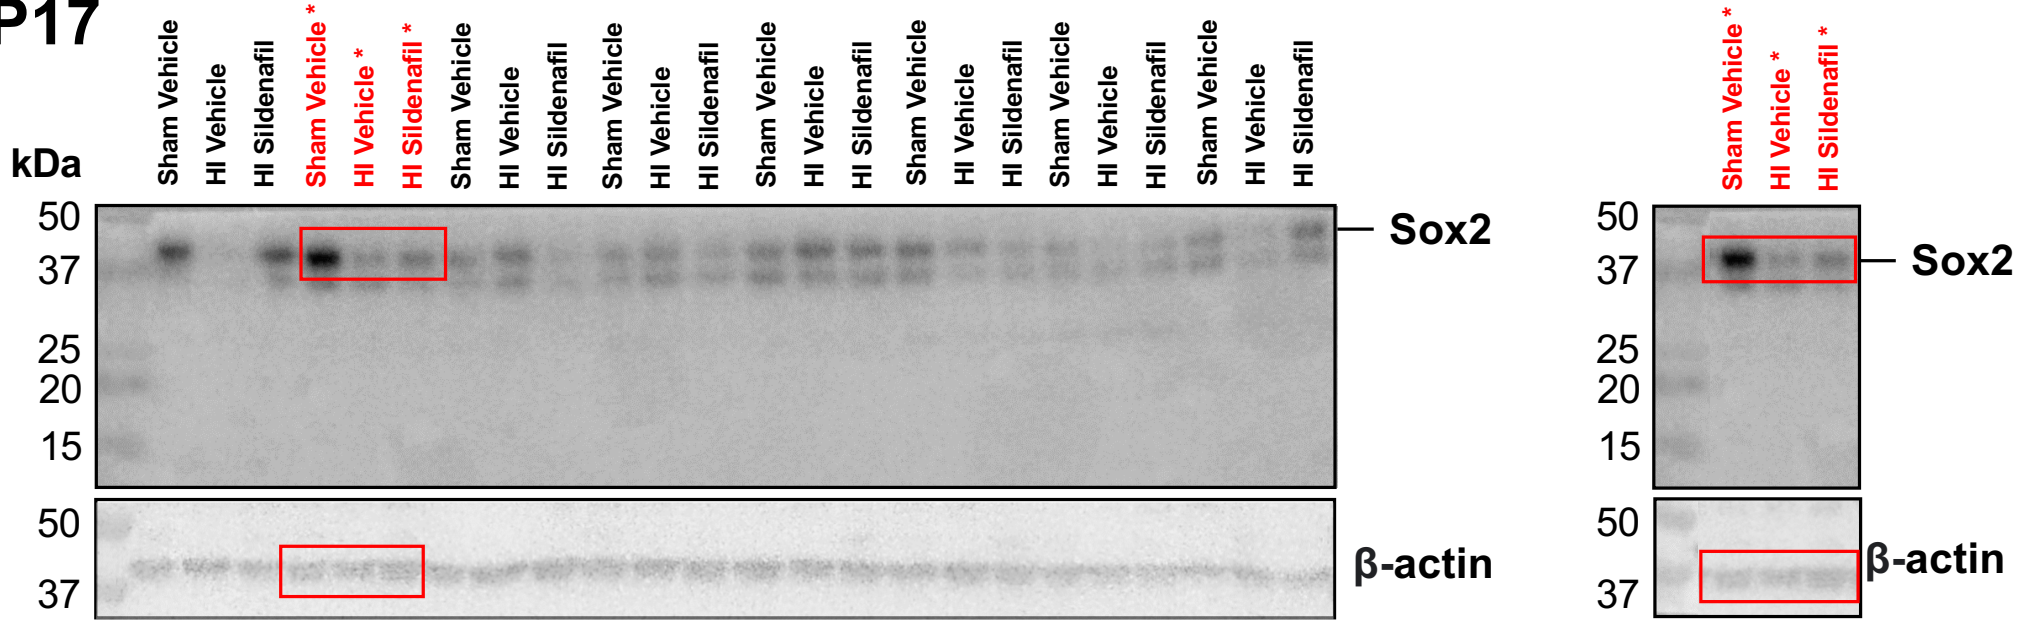

**FIGURE 3A – P17: Western blotting for Sox2 at P17**, showing full-length western blots (on left panel) and representative samples chosen to be cropped for main Figure 3 (on right panel). The regions of the original blots used in main figure have been denoted using red boxes.

**P30**

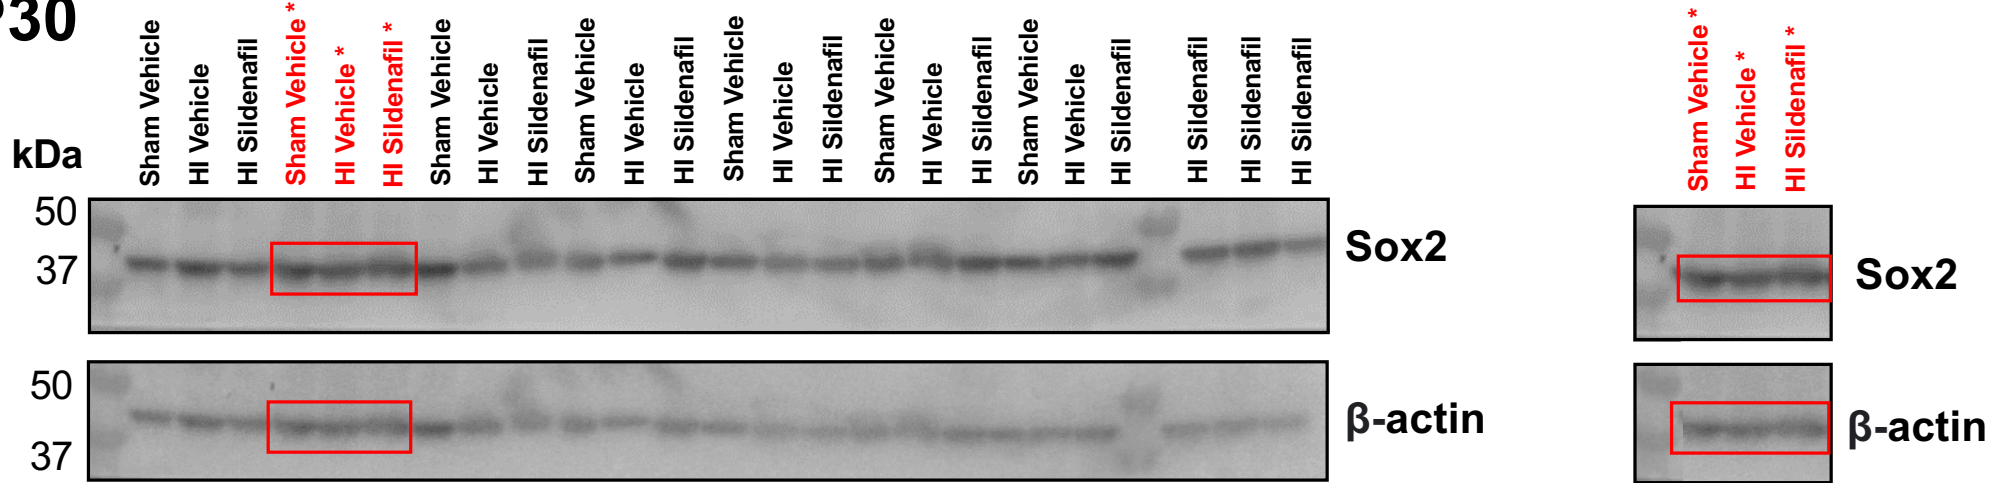

**FIGURE 3A – P30: Western blotting for Sox2 at P30**, showing full-length western blots (on left panel) and representative samples chosen to be cropped for main Figure 3 (on right panel). The regions of the original blots used in main figure have been denoted using red boxes.

Nestin

**P12**

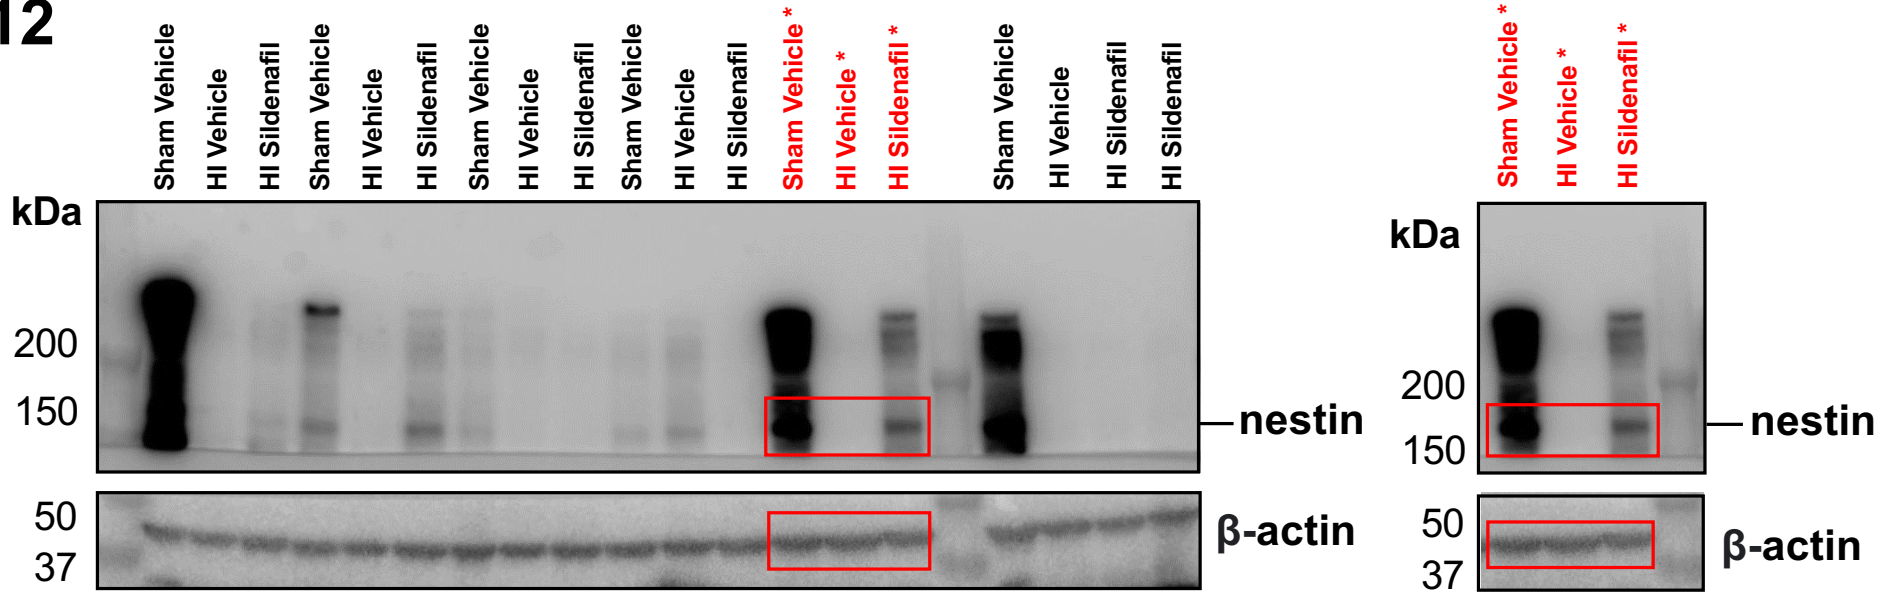

**FIGURE 3B – P12: Western blotting for Nestin at P12**, showing full-length western blots (on left panel) and representative samples chosen to be cropped for main Figure 3 (on right panel). The regions of the original blots used in main figure have been denoted using red boxes.

**P17**

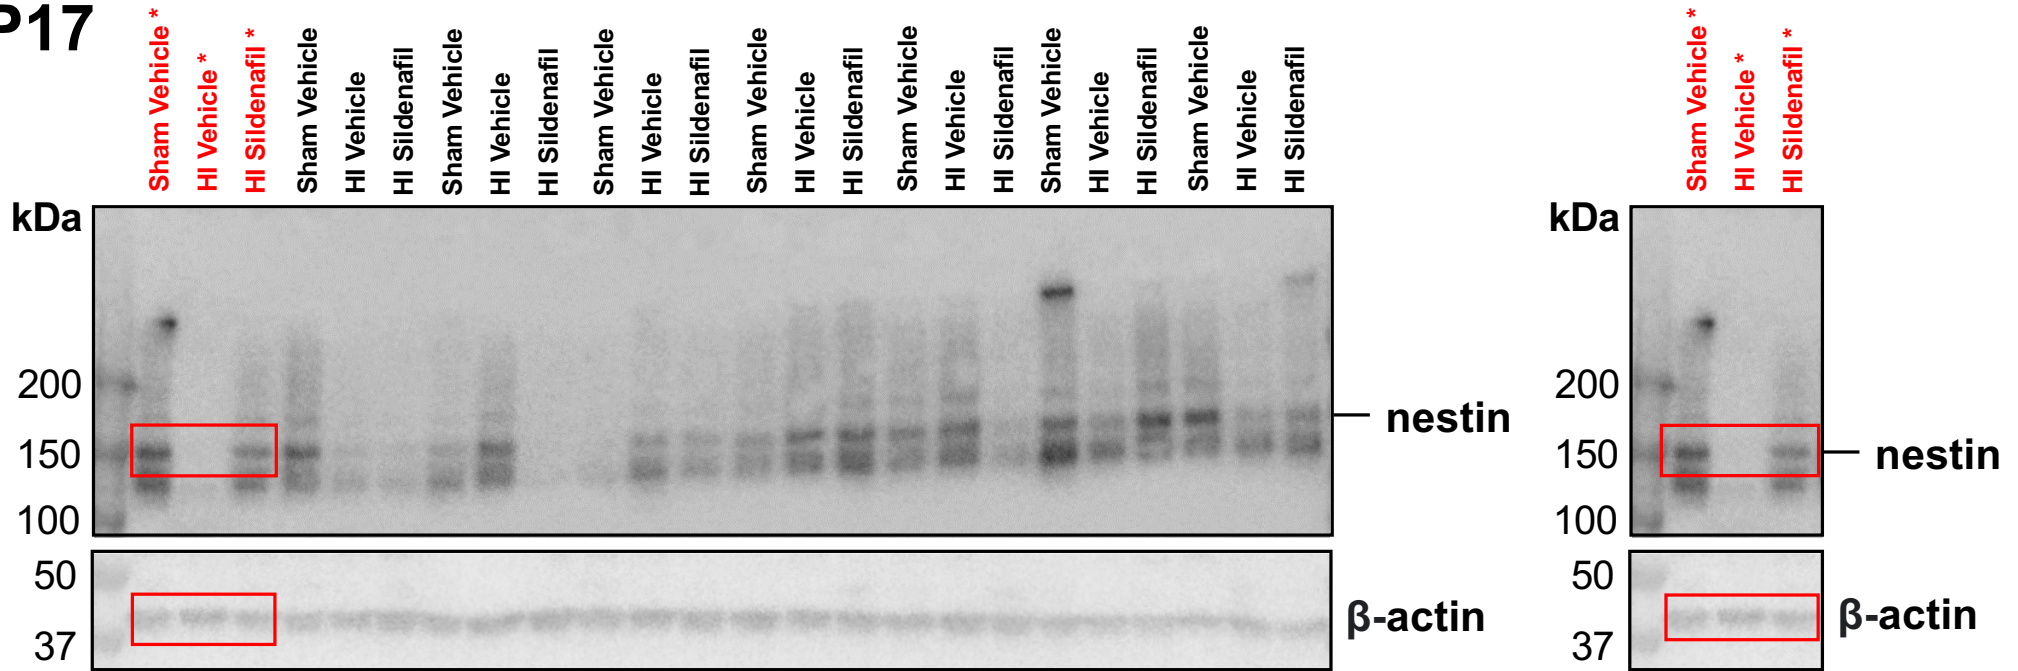

**FIGURE 3B – P17: Western blotting for Nestin at P17**, showing full-length western blots (on left panel) and representative samples chosen to be cropped for main Figure 3 (on right panel). The regions of the original blots used in main figure have been denoted using red boxes.

**P30**

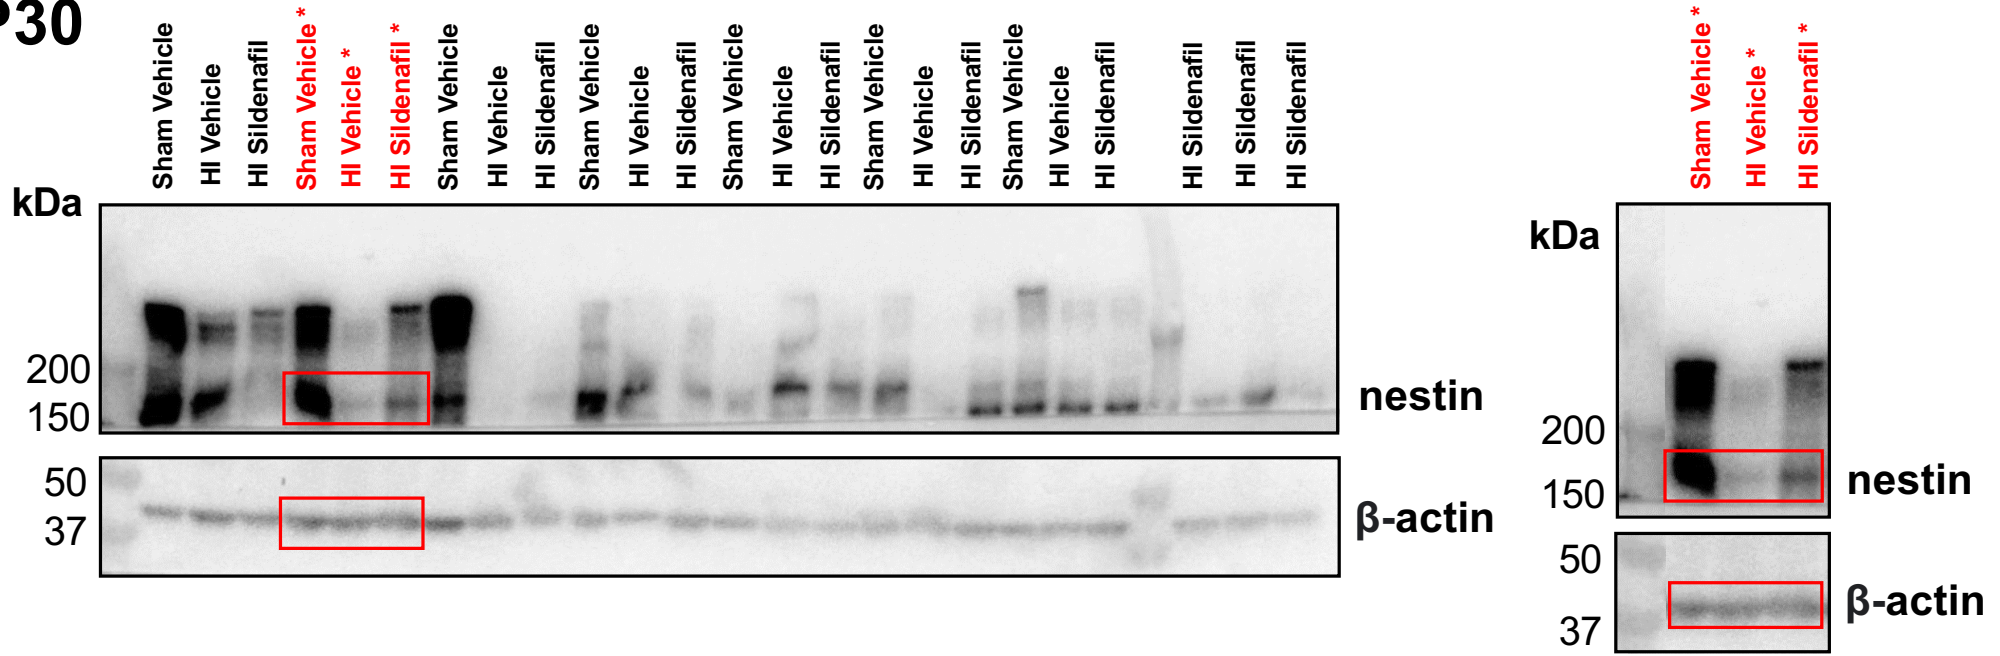

**FIGURE 3B – P30: Western blotting for Nestin at P30**, showing full-length western blots (on left panel) and representative samples chosen to be cropped for main Figure 3 (on right panel). The regions of the original blots used in main figure have been denoted using red boxes.



DCX

**P12**

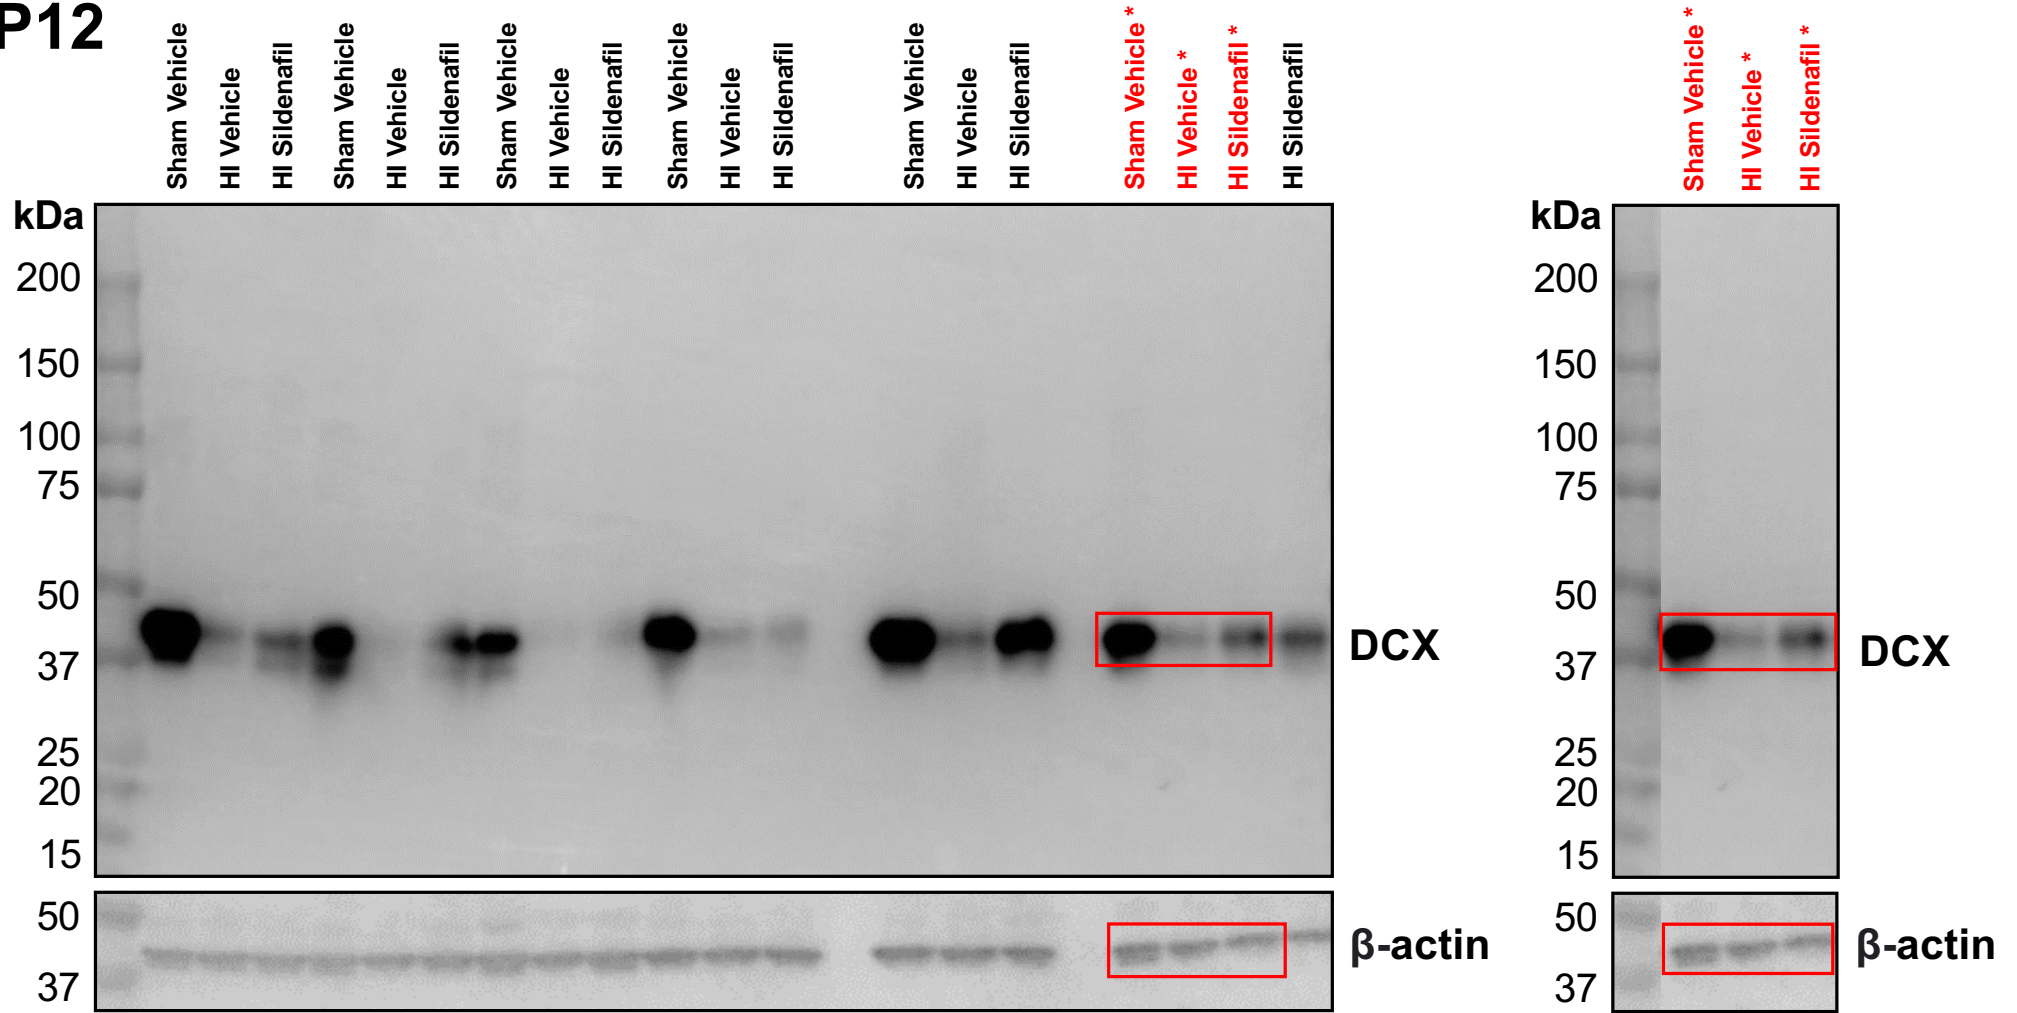

**FIGURE 3C – P12: Western blotting for DCX at P12, showing full-length western blots (on left panel) and representative samples chosen to be cropped for main Figure 3 (on right panel). The regions of the original blots used in main figure have been denoted using red boxes.**

**P17**

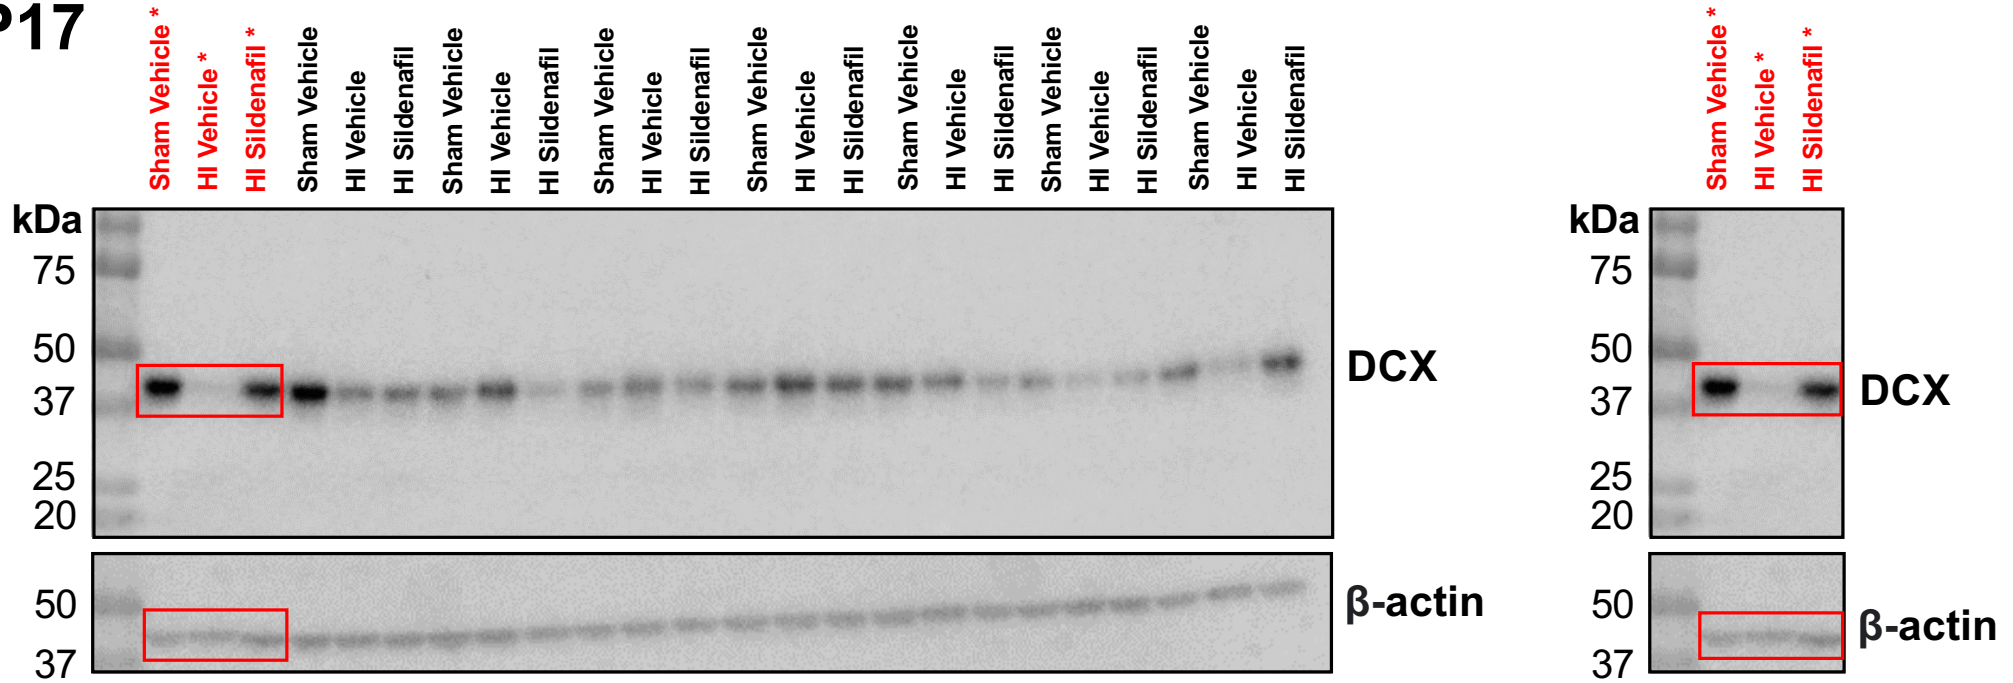

**FIGURE 3C – P17: Western blotting for DCX at P17, showing full-length western blots (on left panel) and representative samples chosen to be cropped for main Figure 3 (on right panel). The regions of the original blots used in main figure have been denoted using red boxes.**

**P30**

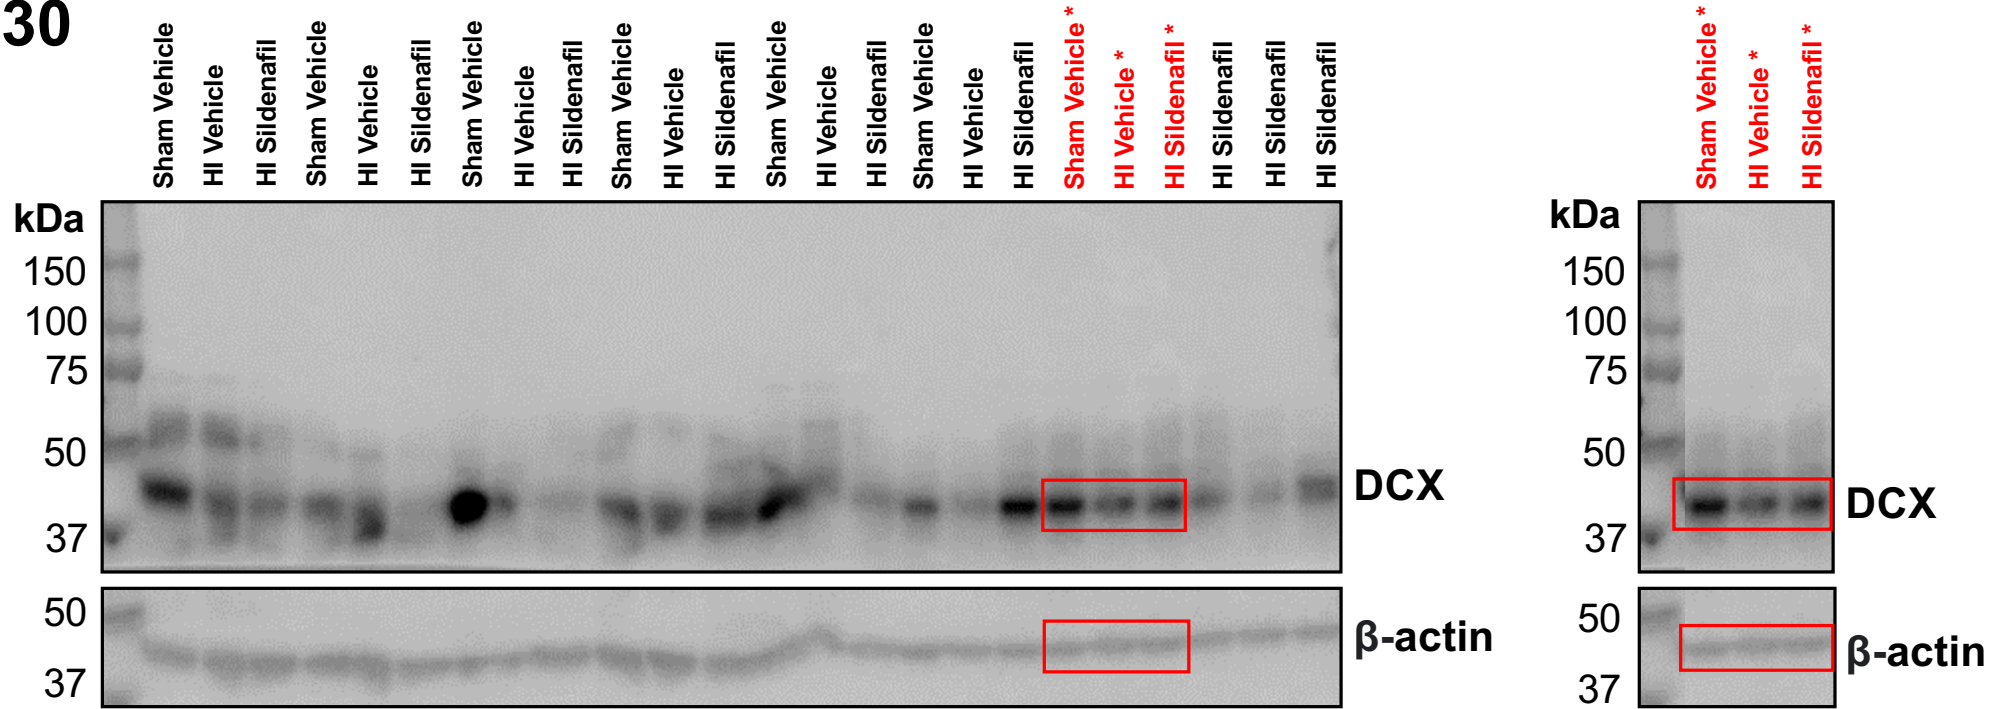

**FIGURE 3C – P30: Western blotting for DCX at P30, showing full-length western blots (on left panel) and representative samples chosen to be cropped for main Figure 3 (on right panel). The regions of the original blots used in main figure have been denoted using red boxes.**

NeuN

**P12**

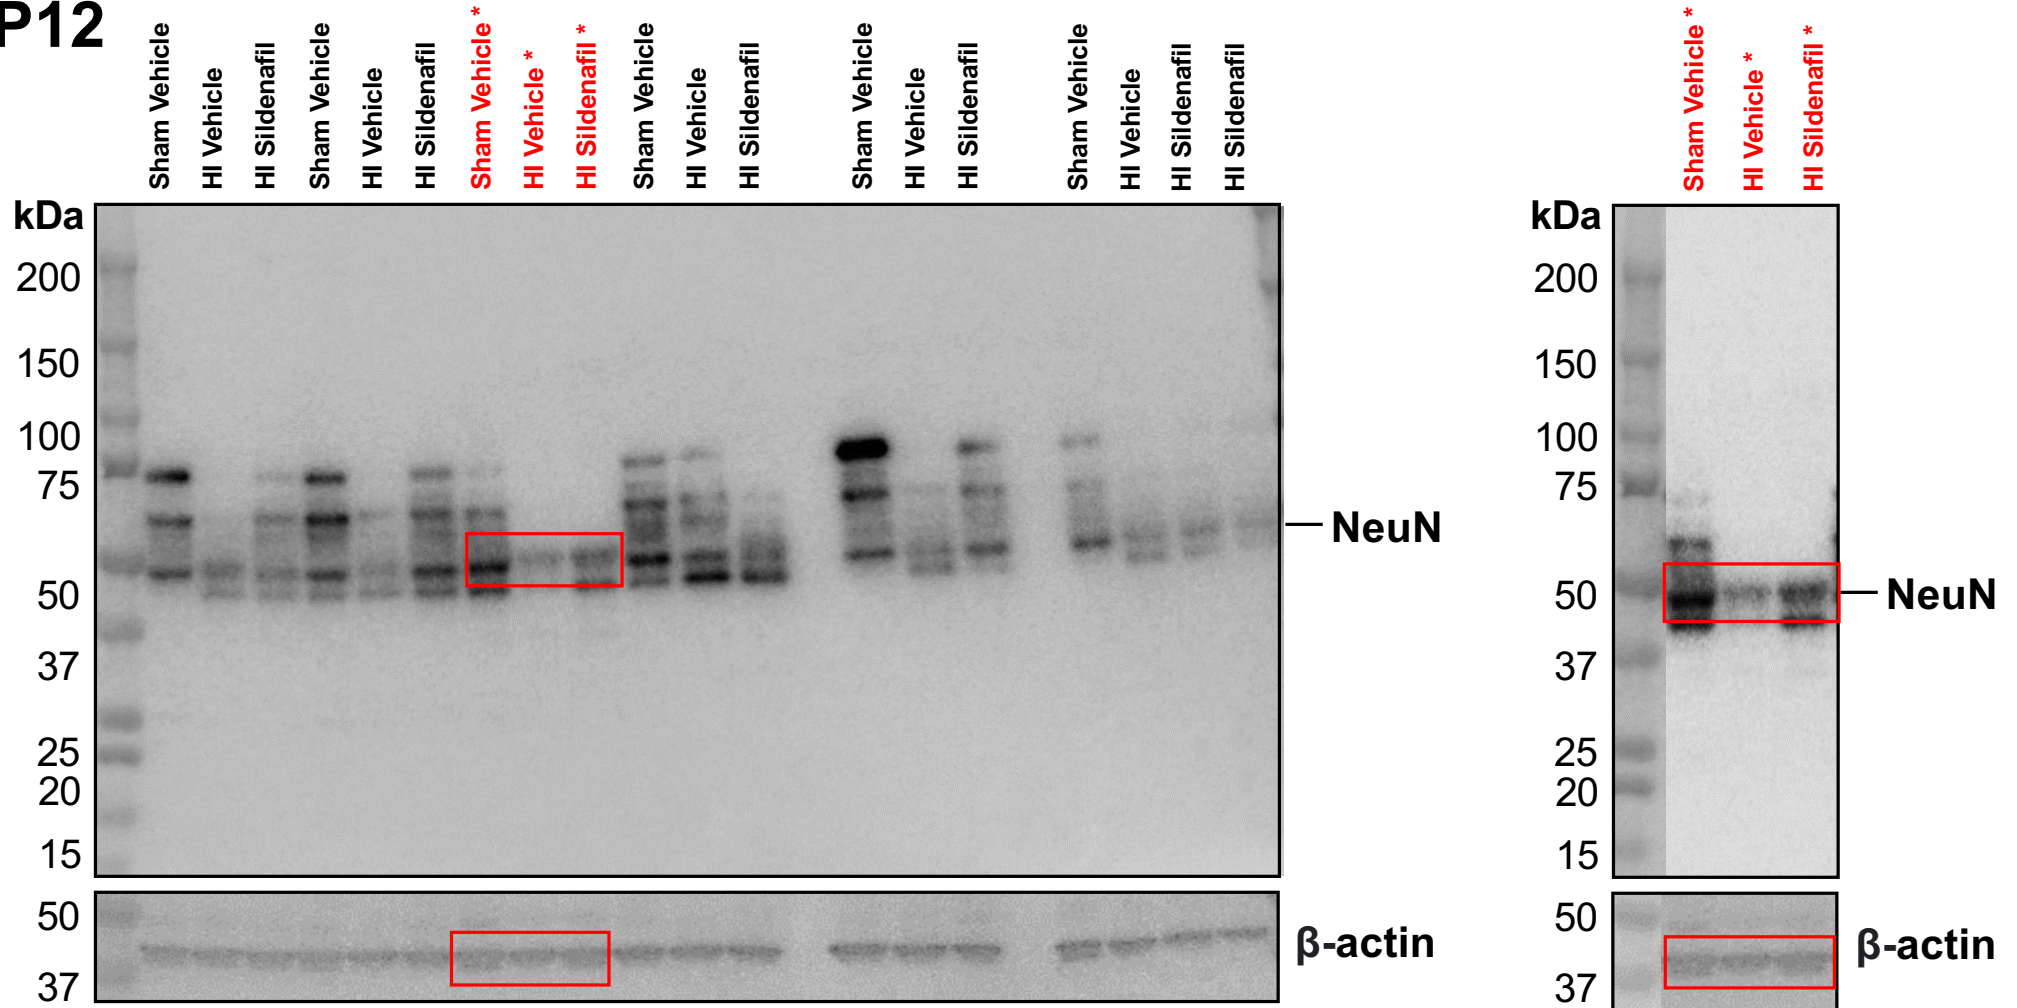

**FIGURE 3D – P12: Western blotting for NeuN at P12, showing full-length western blots (on left panel) and representative samples chosen to be cropped for main Figure 3 (on right panel). The regions of the original blots used in main figure have been denoted using red boxes.**

**P17**

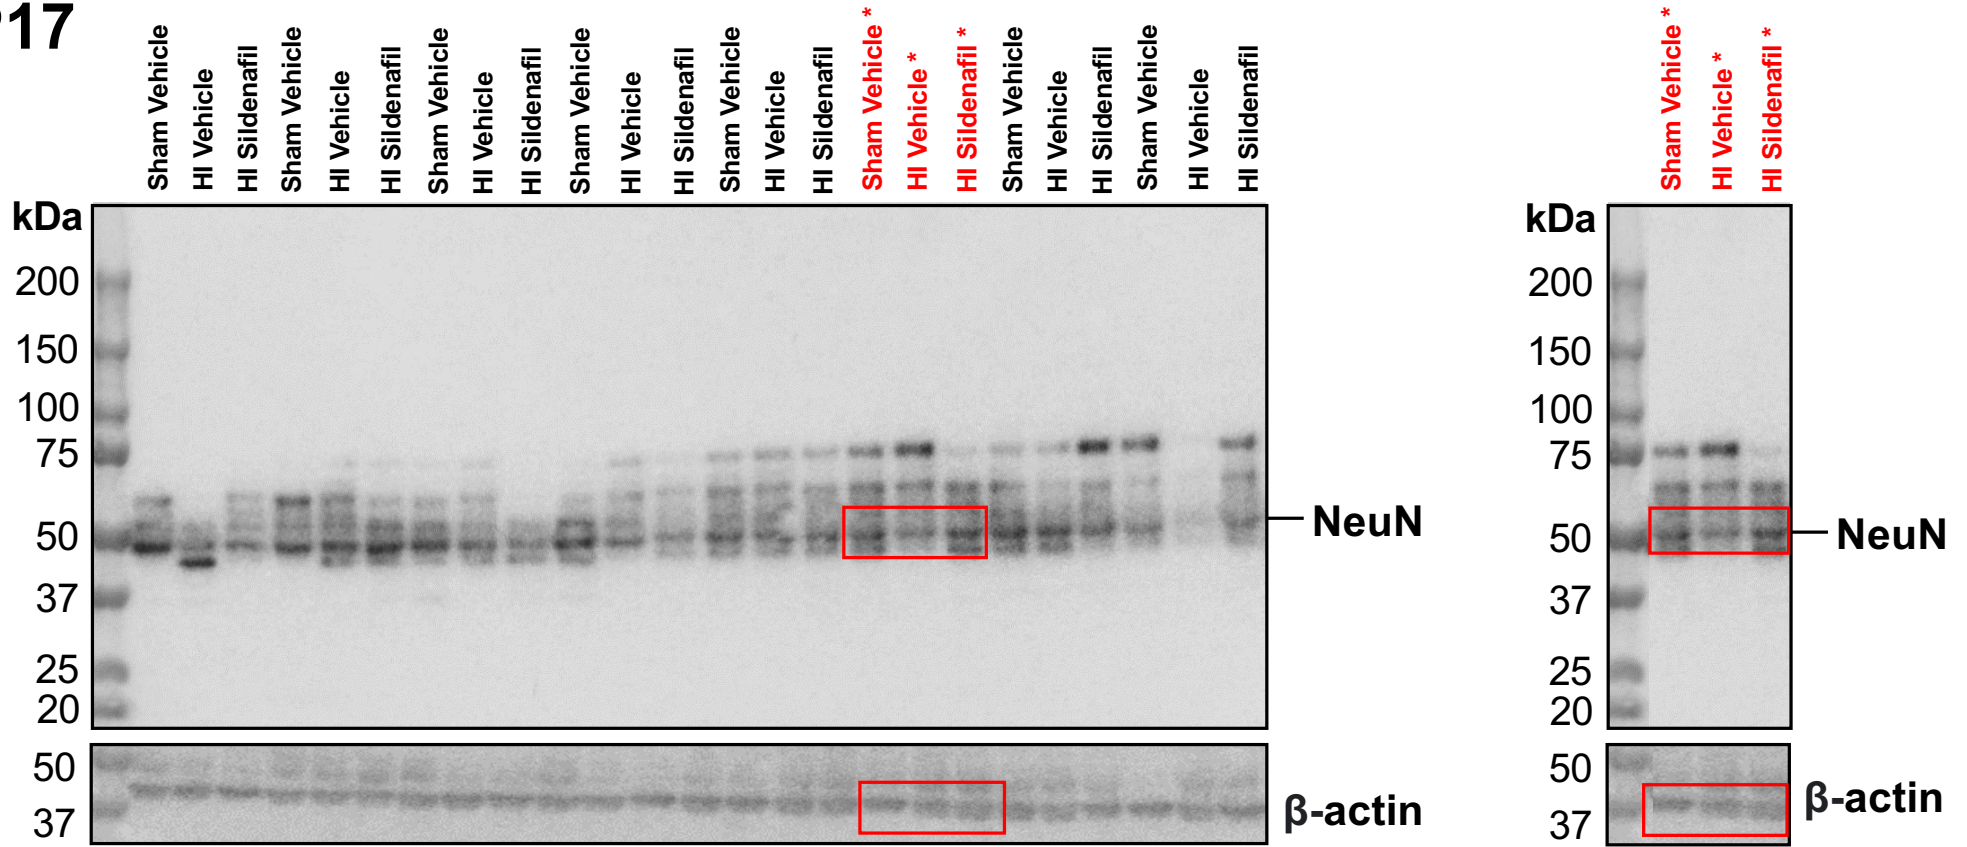

**FIGURE 3D – P17: Western blotting for NeuN at P17, showing full-length western blots (on left panel) and representative samples chosen to be cropped for main Figure 3 (on right panel). The regions of the original blots used in main figure have been denoted using red boxes.**

**P30**

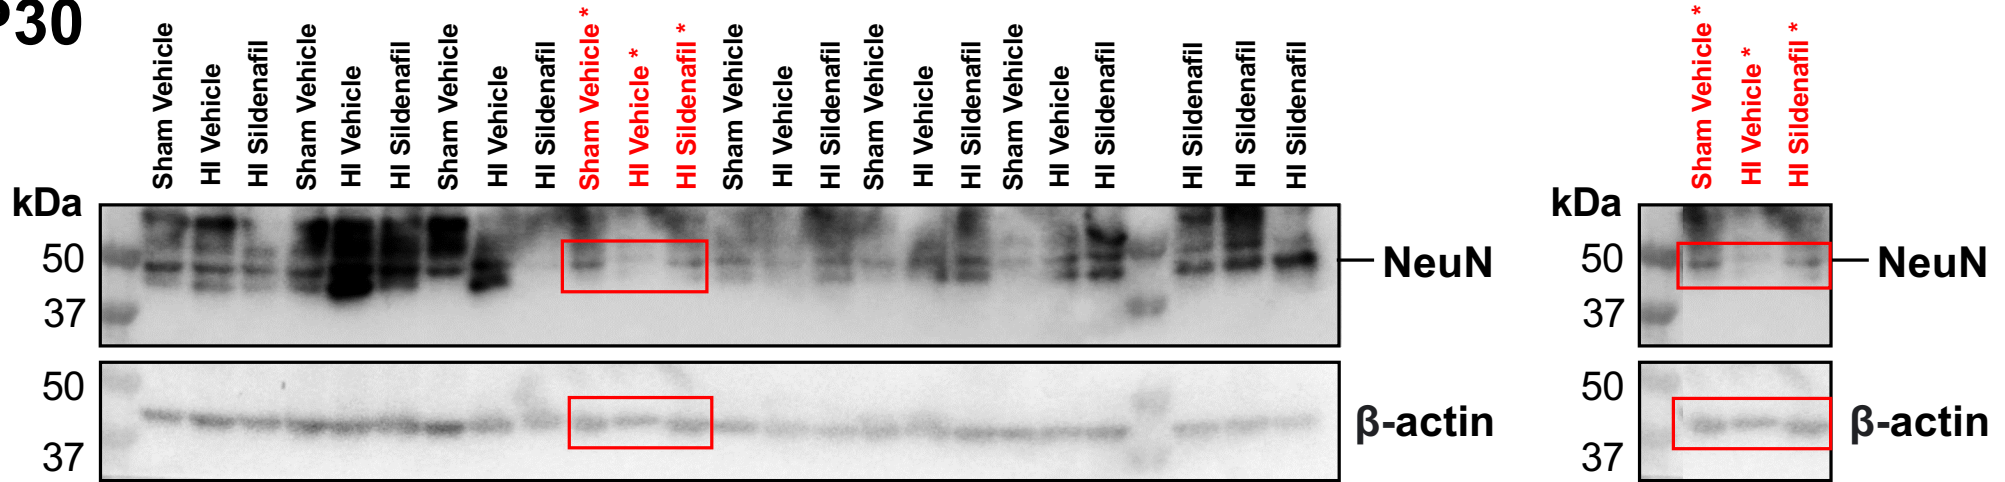

**FIGURE 3D – P30: Western blotting for NeuN at P30**, showing full-length western blots (on left panel) and representative samples chosen to be cropped for main Figure 3 (on right panel). The regions of the original blots used in main figure have been denoted using red boxes.



Calretinin

**P12**

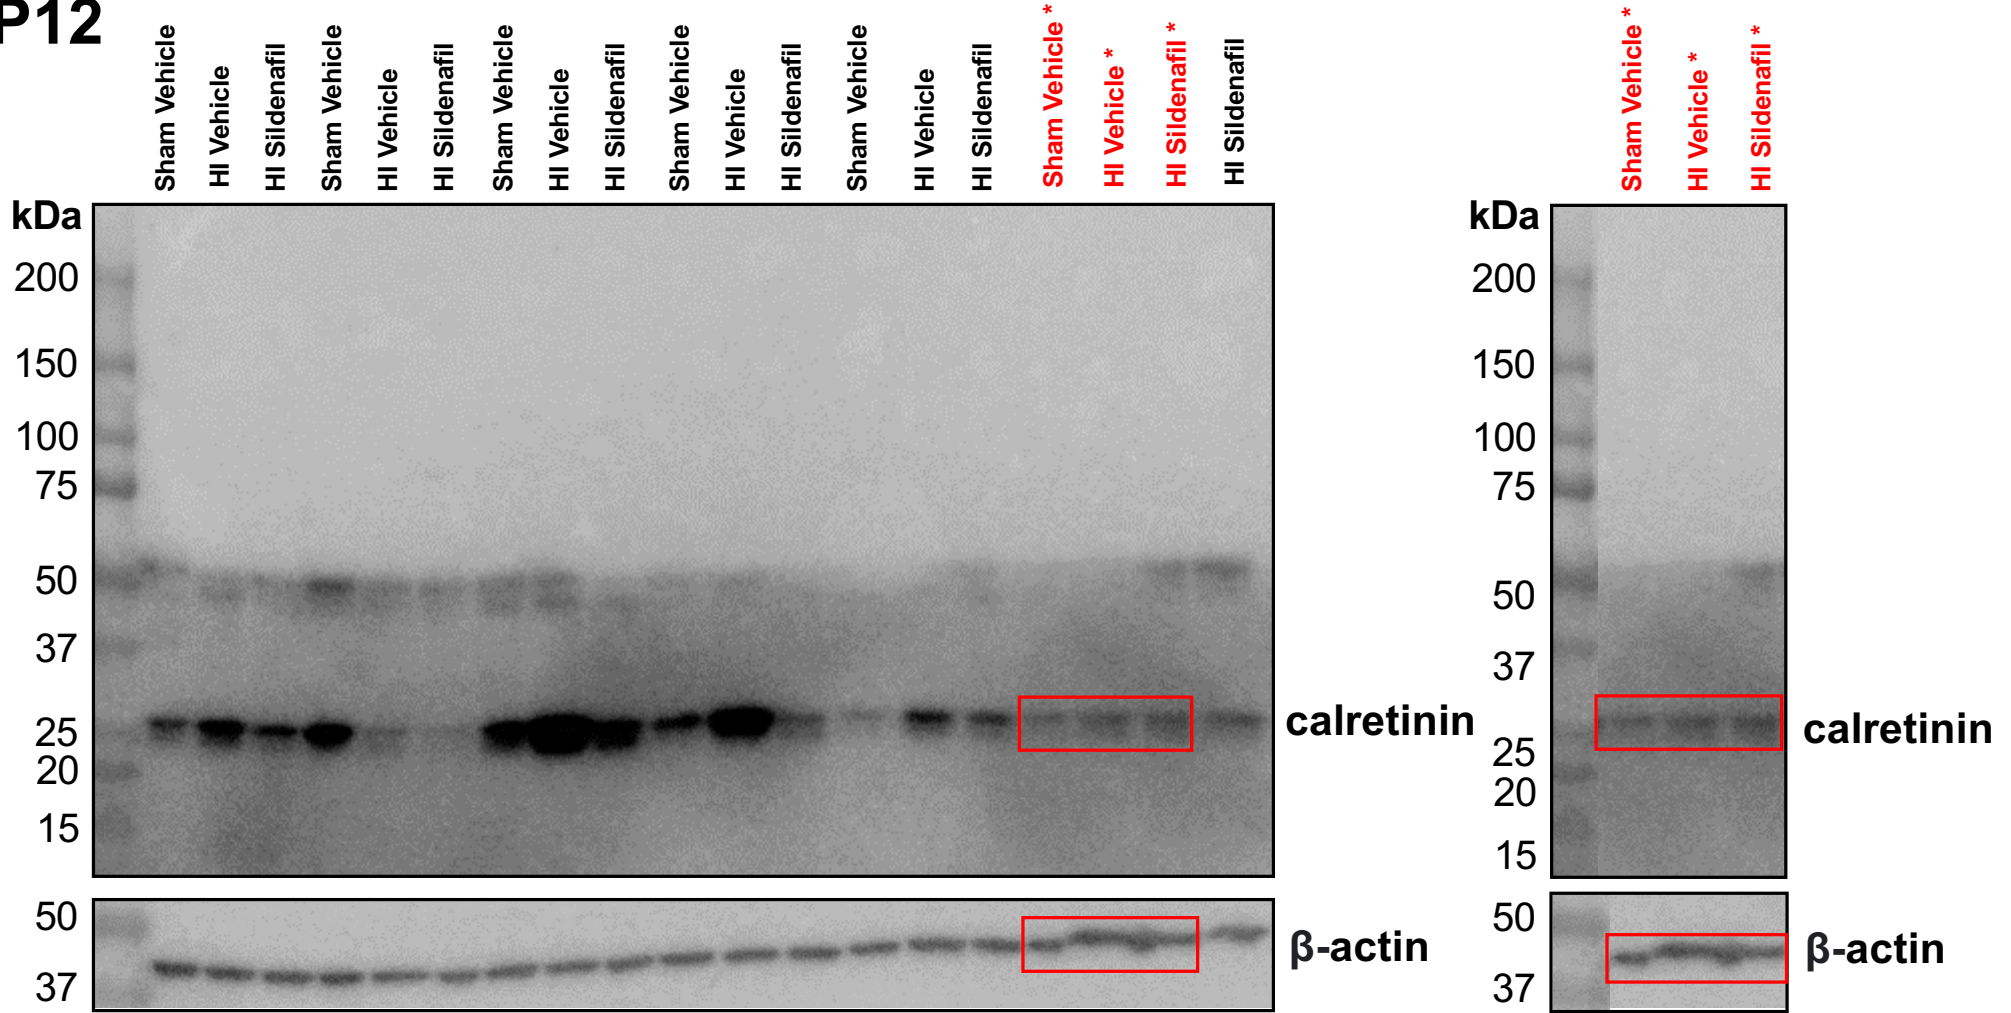

**FIGURE 3E – P12: Western blotting for Calretinin at P12, showing full-length western blots (on left panel) and representative samples chosen to be cropped for main Figure 3 (on right panel). The regions of the original blots used in main figure have been denoted using red boxes.**

# P17

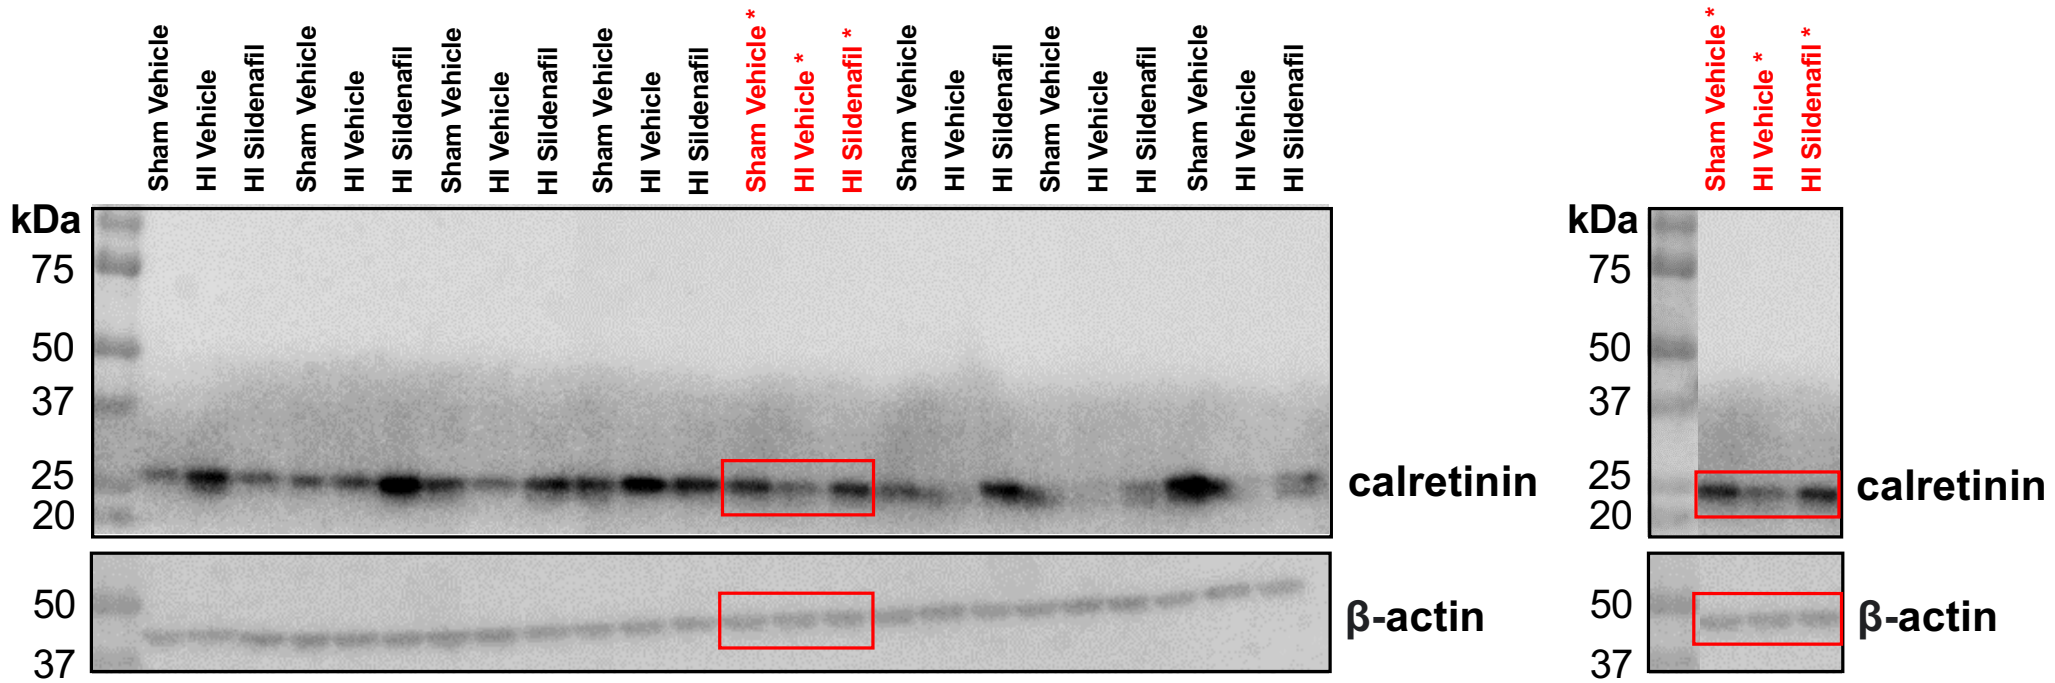

**FIGURE 3E – P17: Western blotting for Calretinin at P17, showing full-length western blots (on left panel) and representative samples chosen to be cropped for main Figure 3 (on right panel). The regions of the original blots used in main figure have been denoted using red boxes.**

**P30**

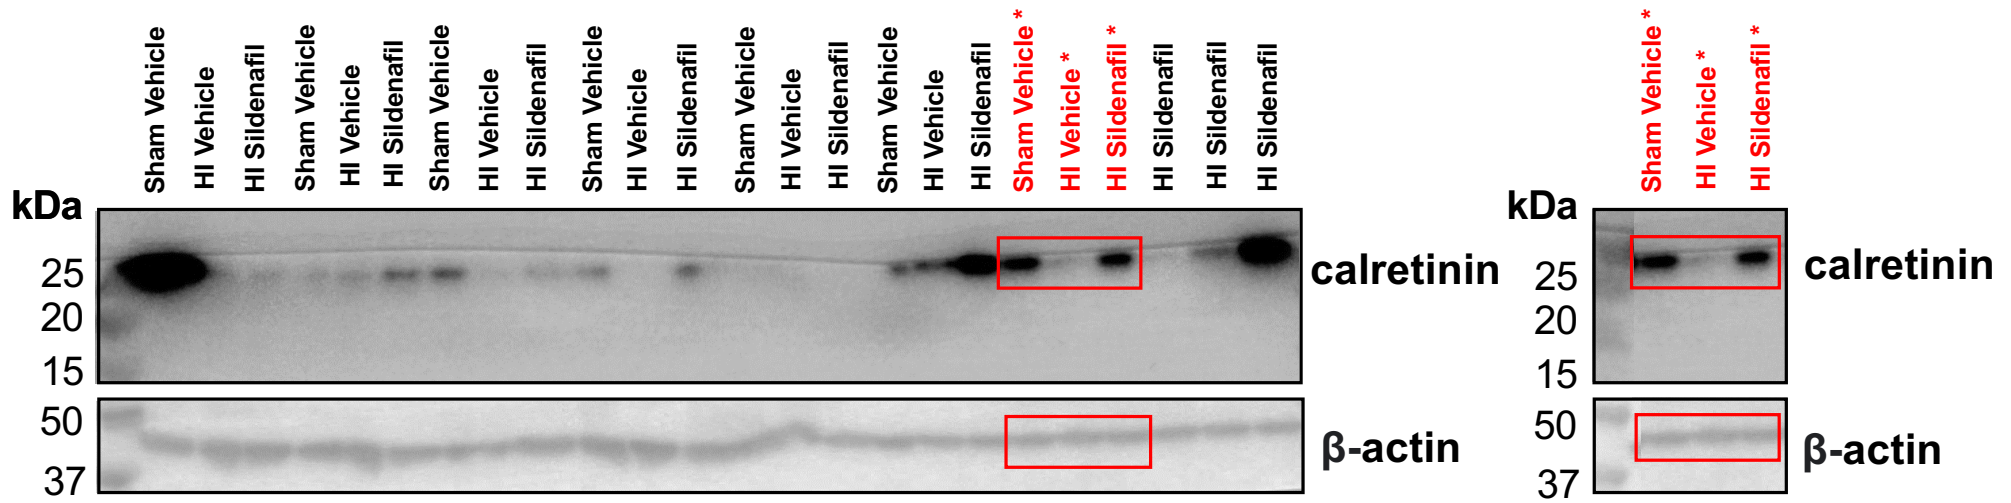

**FIGURE 3E – P30: Western blotting for Calretinin at P30, showing full-length western blots (on left panel) and representative samples chosen to be cropped for main Figure 3 (on right panel). The regions of the original blots used in main figure have been denoted using red boxes.**

Calbindin

**P12**

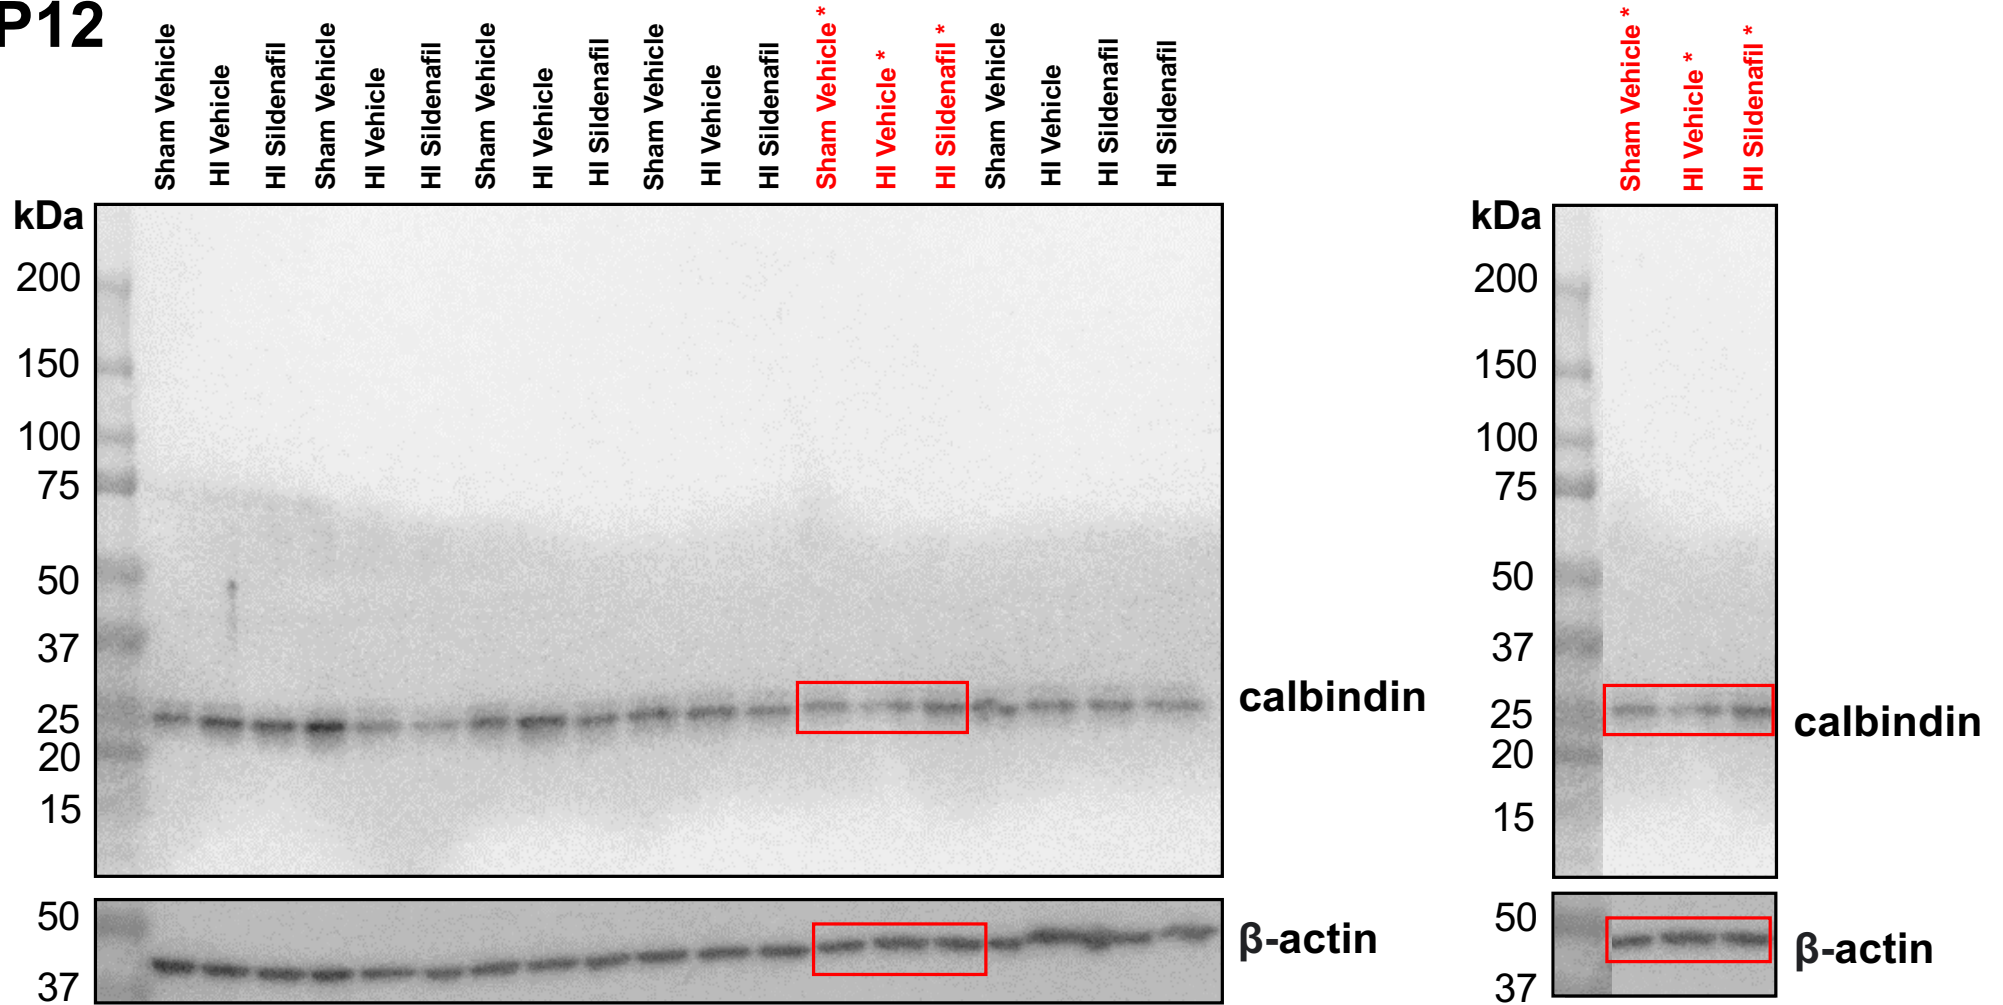

**FIGURE 3F – P12: Western blotting for Calbindin at P12, showing full-length western blots (on left panel) and representative samples chosen to be cropped for main Figure 3 (on right panel). The regions of the original blots used in main figure have been denoted using red boxes.**

# P17

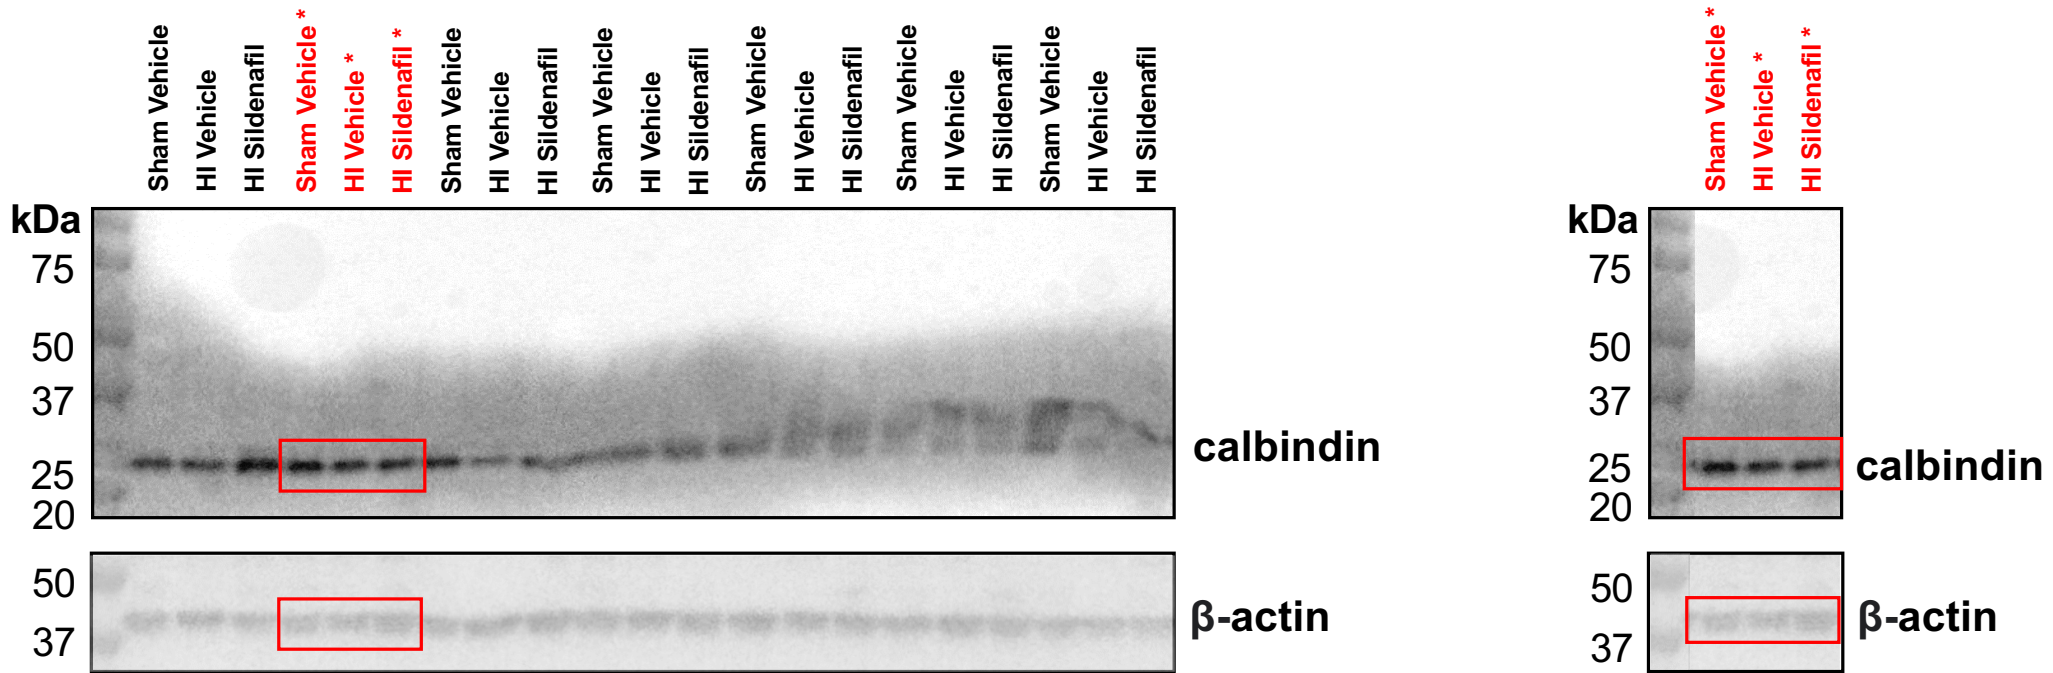

**FIGURE 3F – P17: Western blotting for Calbindin at P17, showing full-length western blots (on left panel) and representative samples chosen to be cropped for main Figure 3 (on right panel). The regions of the original blots used in main figure have been denoted using red boxes.**

# P30

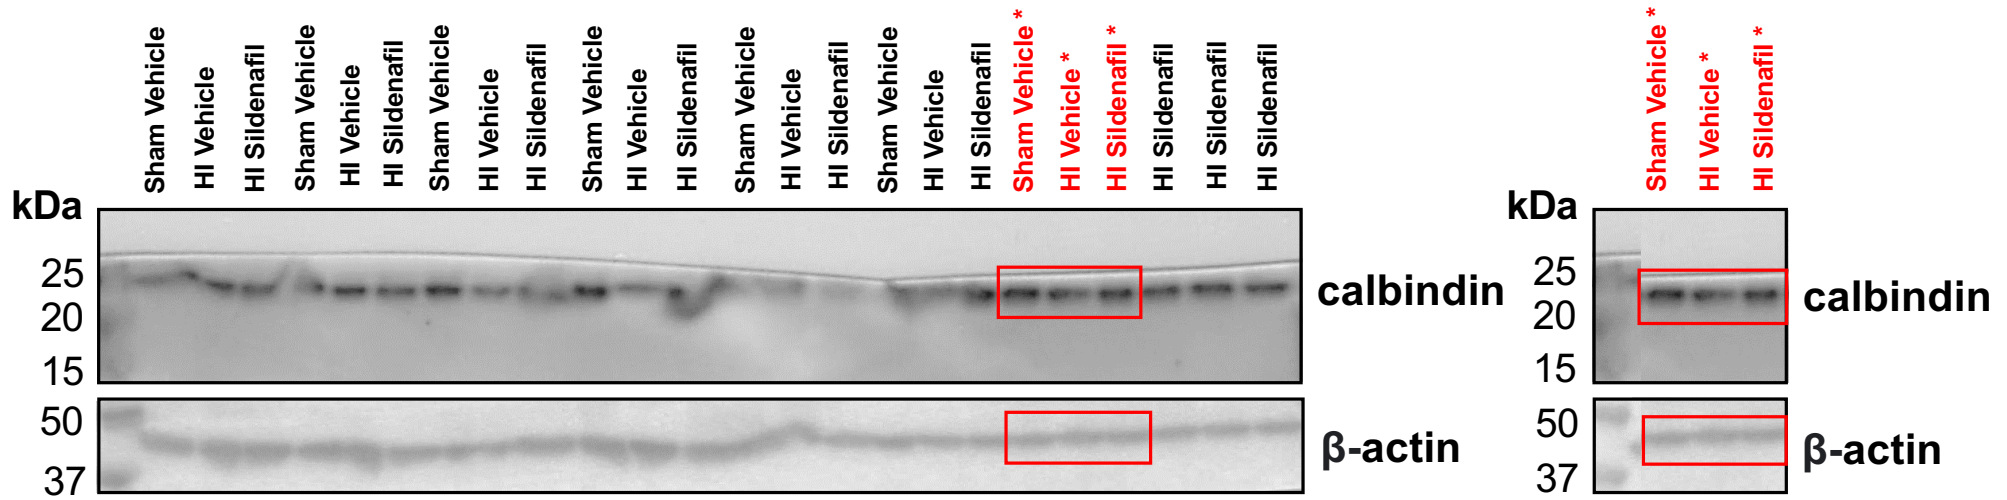

**FIGURE 3F – P30: Western blotting for Calbindin at P30**, showing full-length western blots (on left panel) and representative samples chosen to be cropped for main Figure 3 (on right panel). The regions of the original blots used in main figure have been denoted using red boxes.



PARP

**P12**

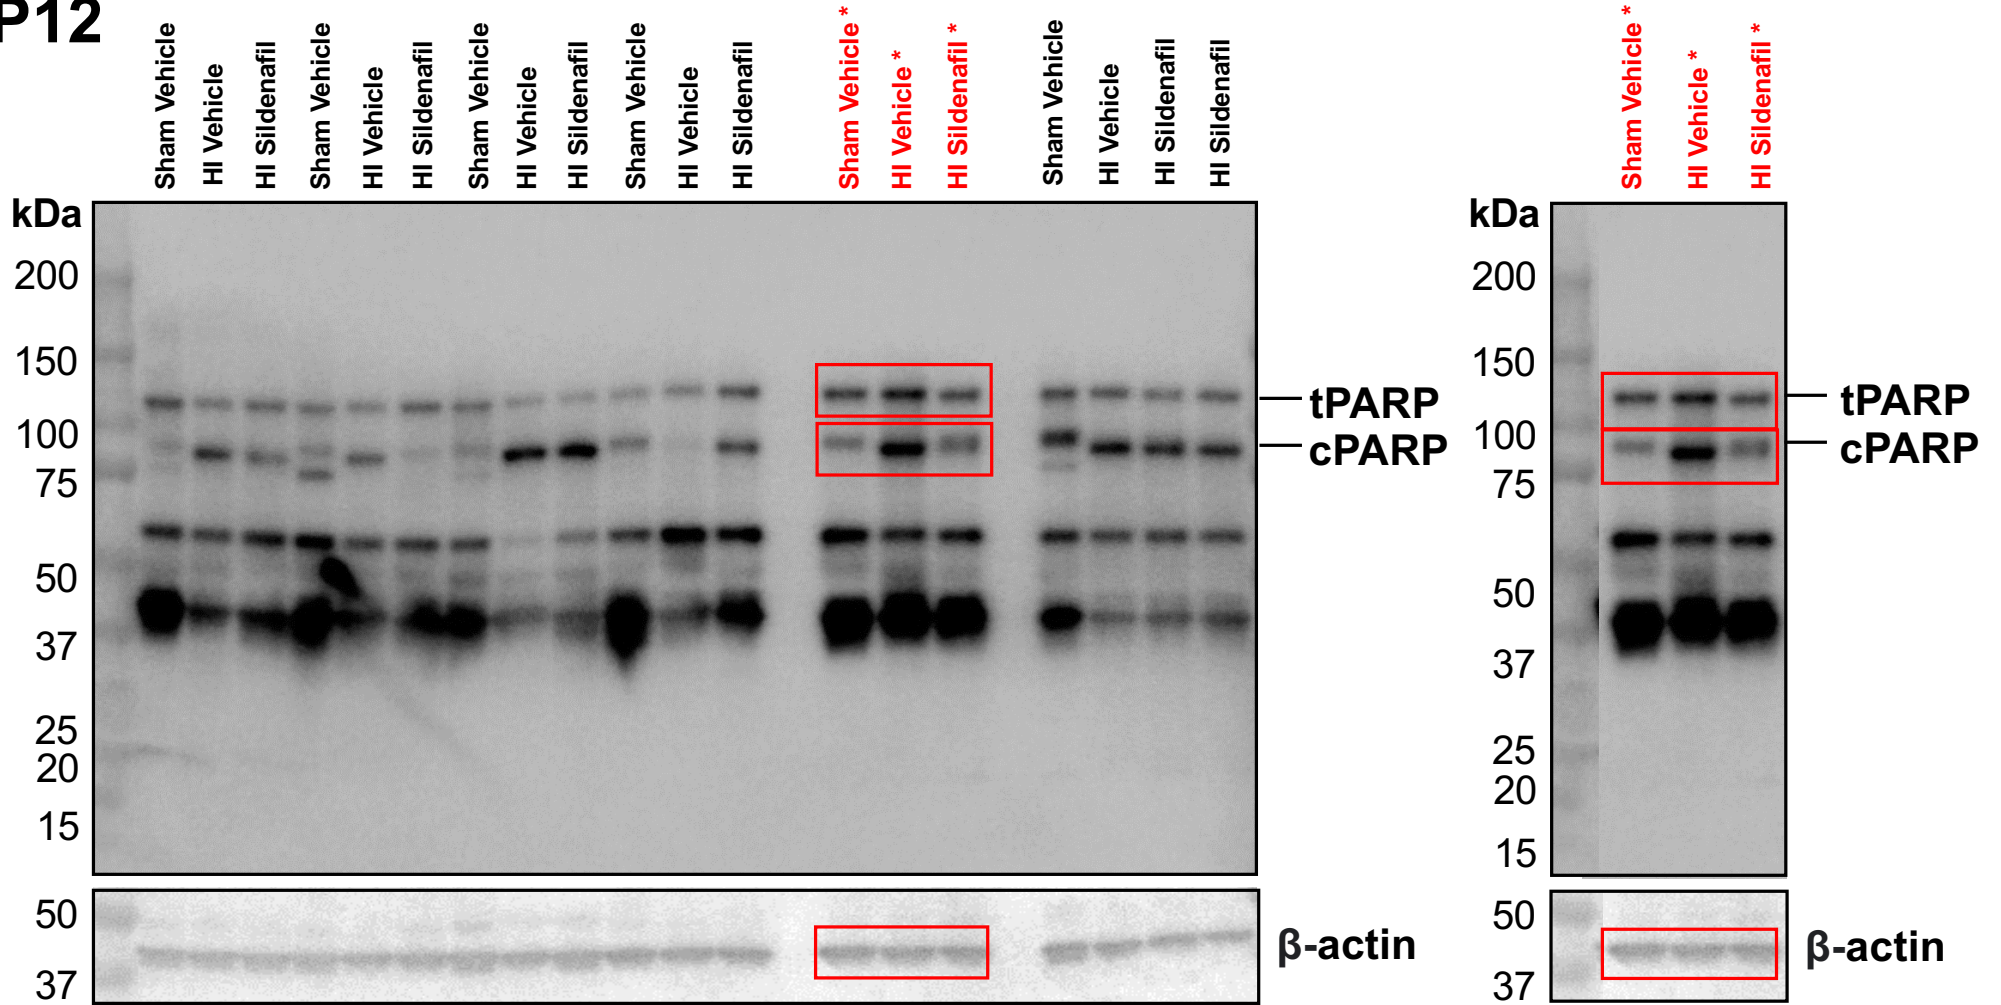

**FIGURE 3G – P12: Western blotting for PARP at P12, showing full-length western blots (on left panel) and representative samples chosen to be cropped for main Figure 3 (on right panel). The regions of the original blots used in main figure have been denoted using red boxes.**

# P17

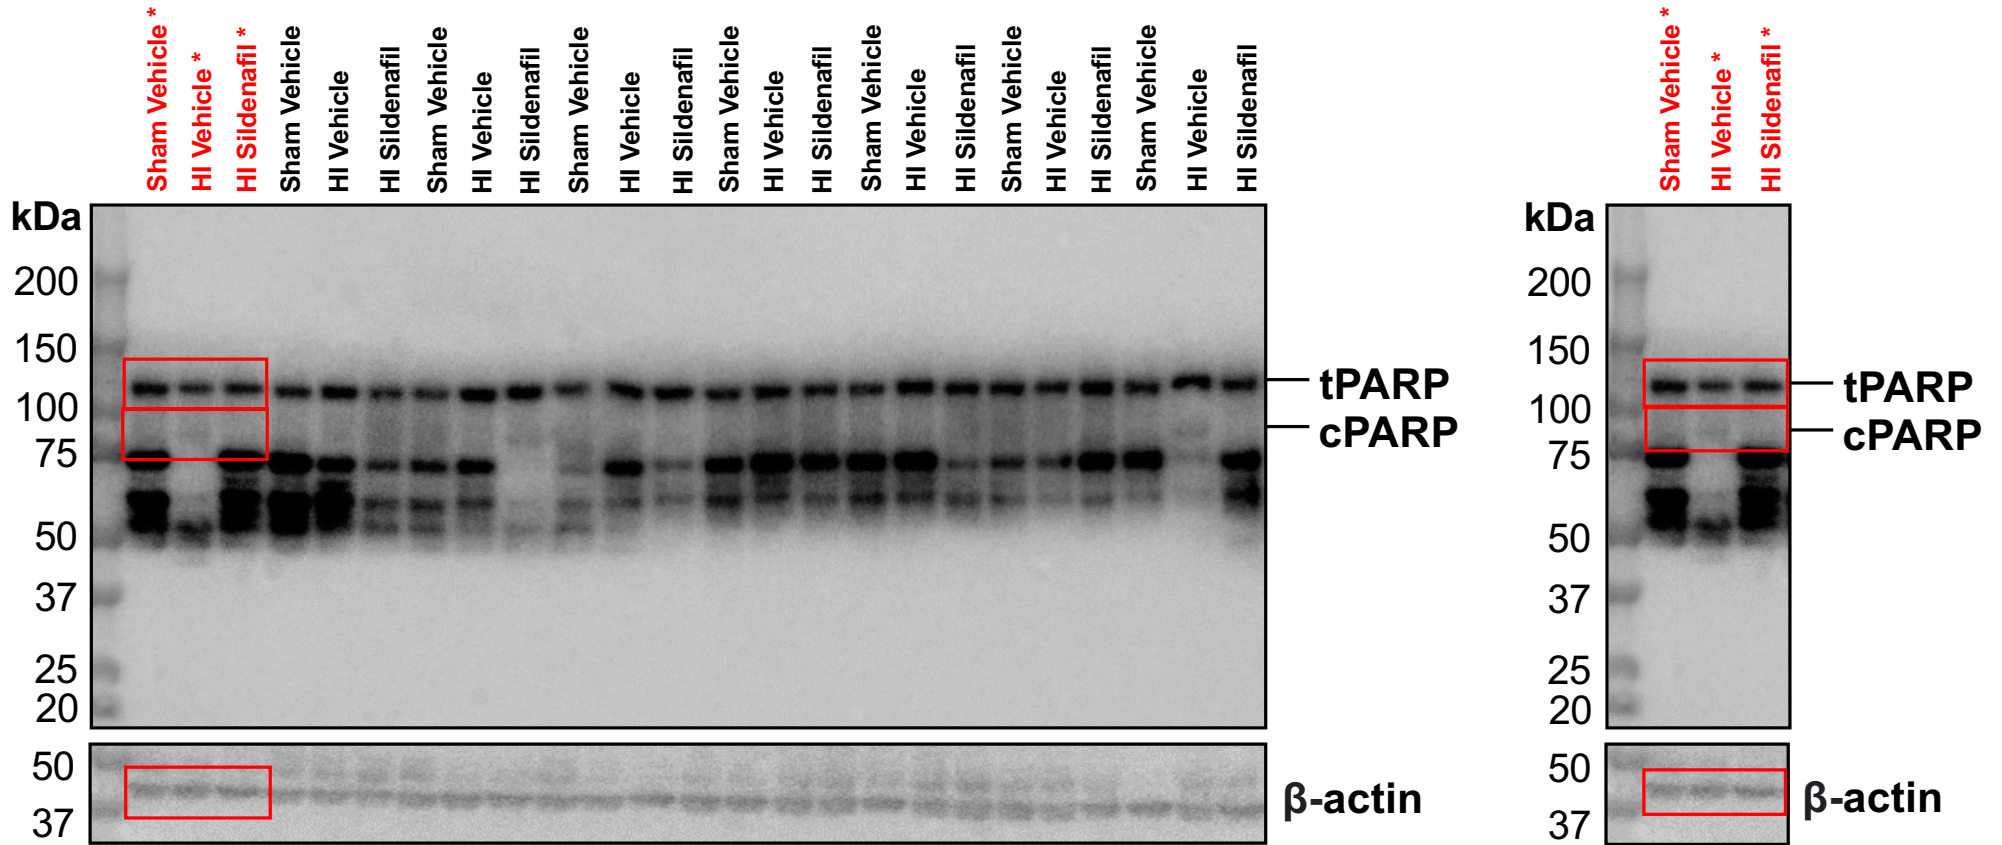

**FIGURE 3G – P17: Western blotting for PARP at P17**, showing full-length western blots (on left panel) and representative samples chosen to be cropped for main Figure 3 (on right panel). The regions of the original blots used in main figure have been denoted using red boxes.

# P30

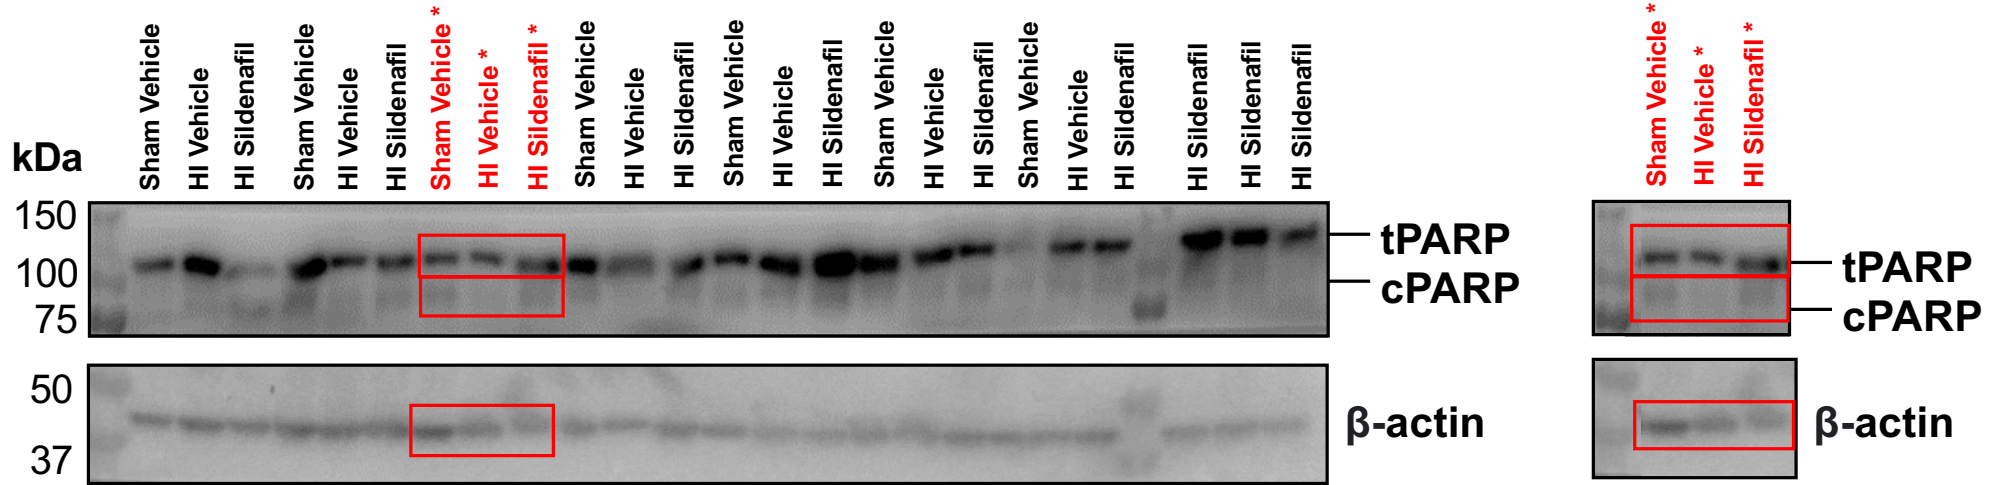

**FIGURE 3G – P30: Western blotting for PARP at P30**, showing full-length western blots (on left panel) and representative samples chosen to be cropped for main Figure 3 (on right panel). The regions of the original blots used in main figure have been denoted using red boxes.

GAP43

**P12**

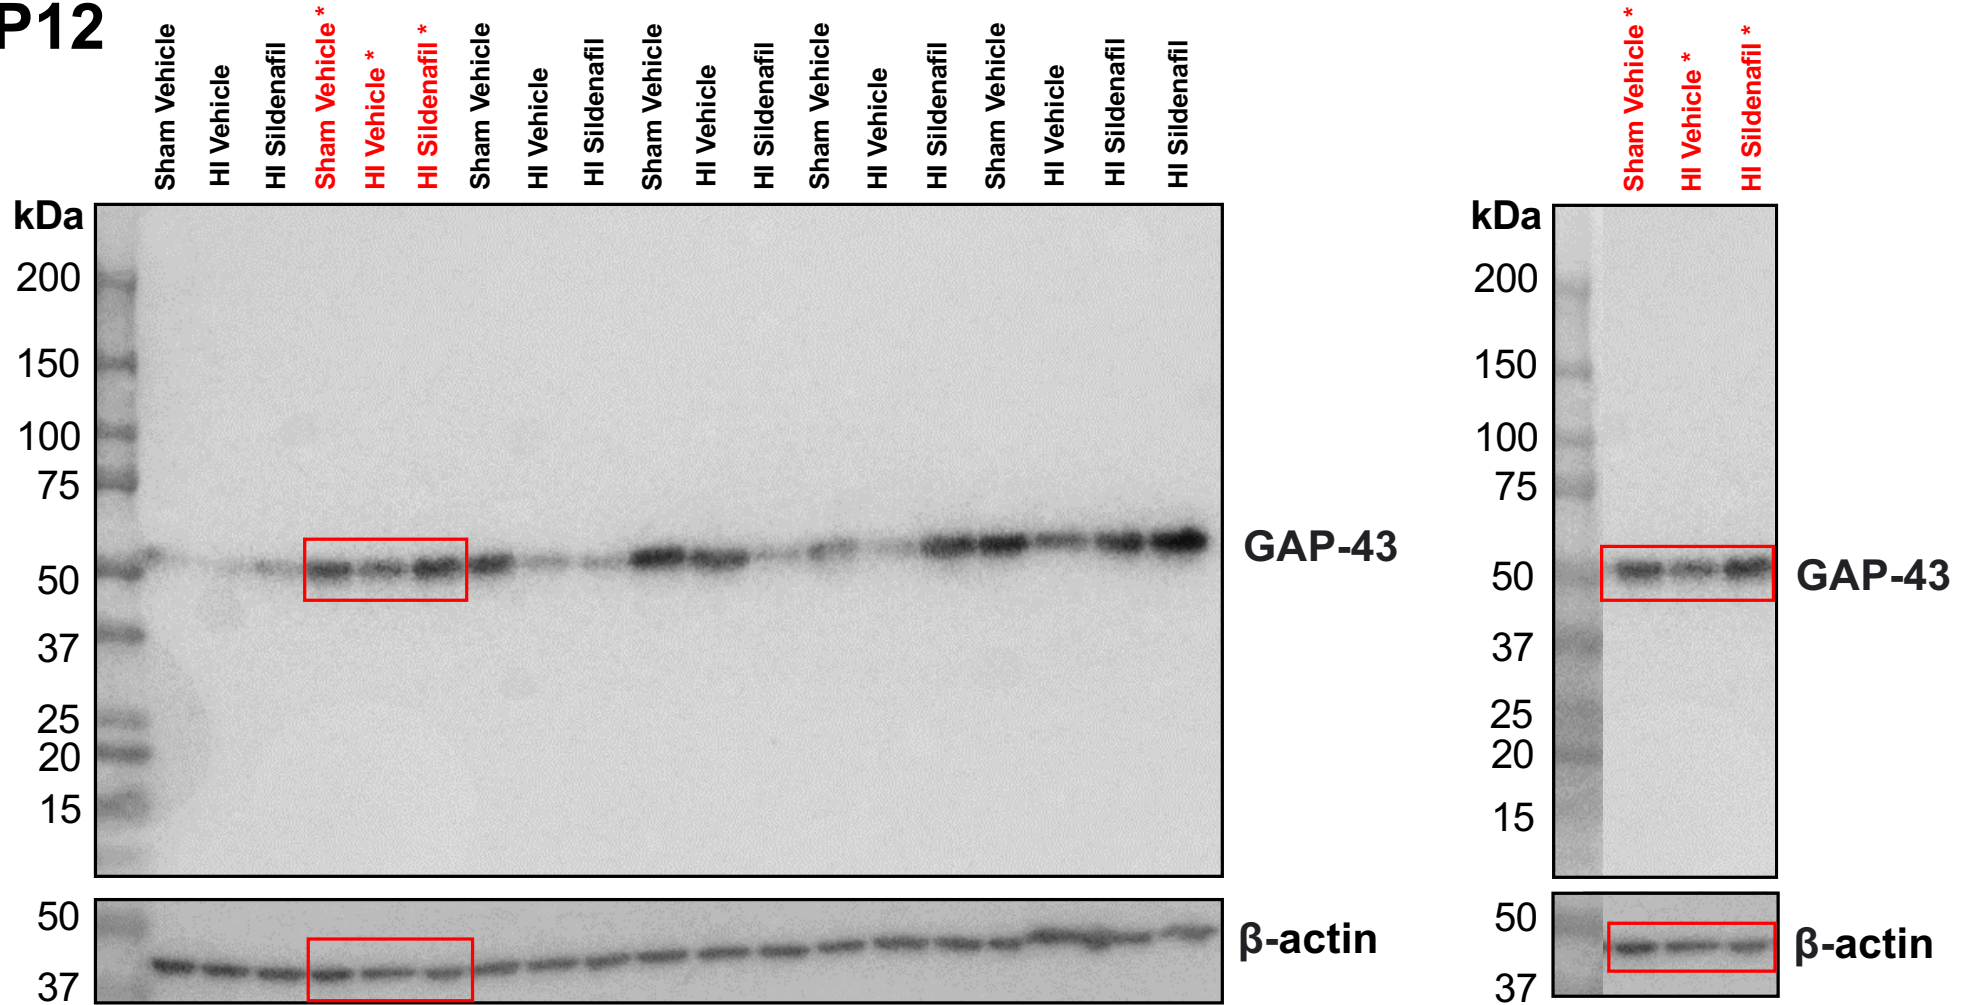

**FIGURE 3H – P12: Western blotting for GAP-43 at P12, showing full-length western blots (on left panel) and representative samples chosen to be cropped for main Figure 3 (on right panel). The regions of the original blots used in main figure have been denoted using red boxes.**

# P17

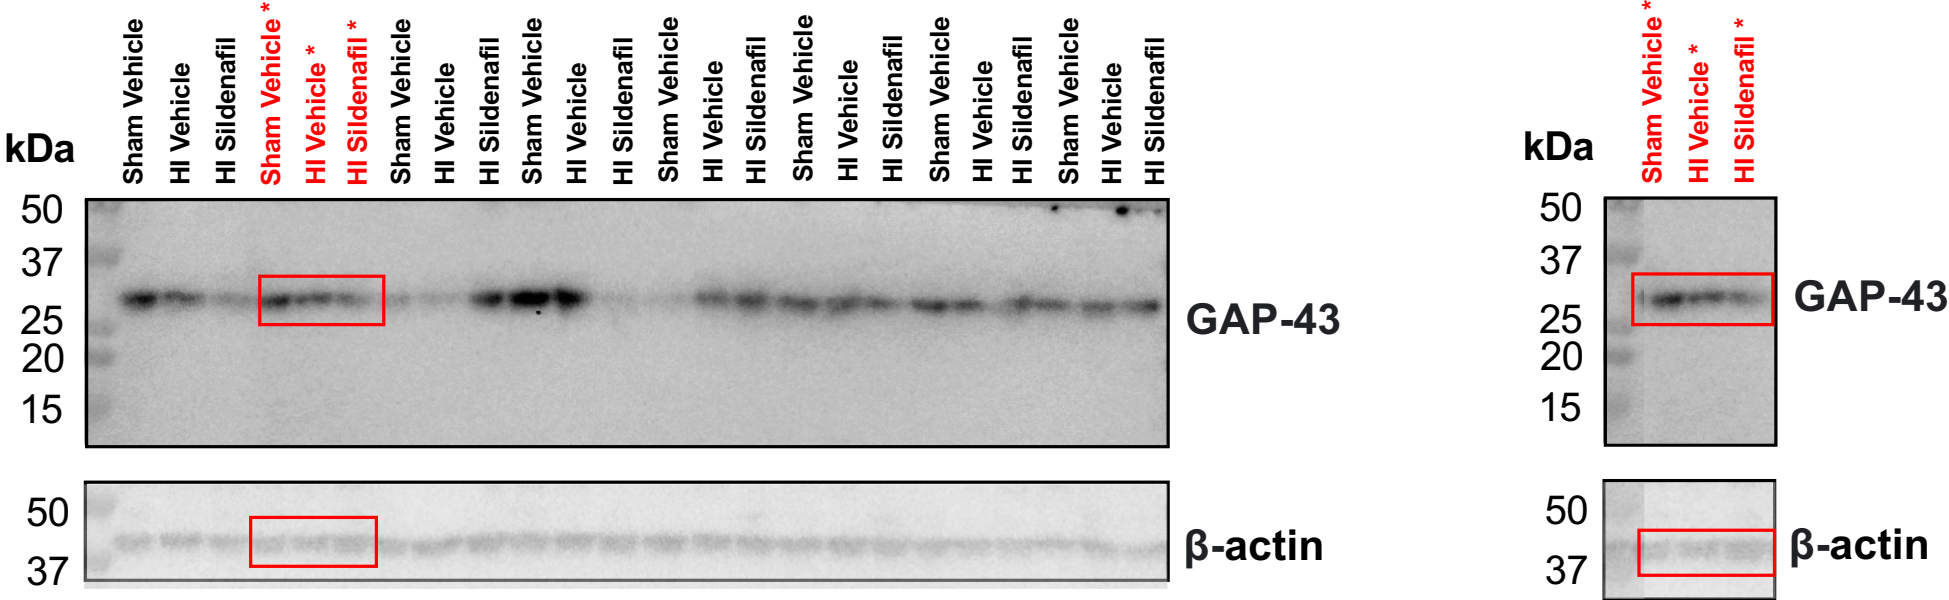

FIGURE 3H – P17: Western blotting for GAP-43 at P17, showing full-length western blots (on left panel) and representative samples chosen to be cropped for main Figure 3 (on right panel). The regions of the original blots used in main figure have been denoted using red boxes.

# P30

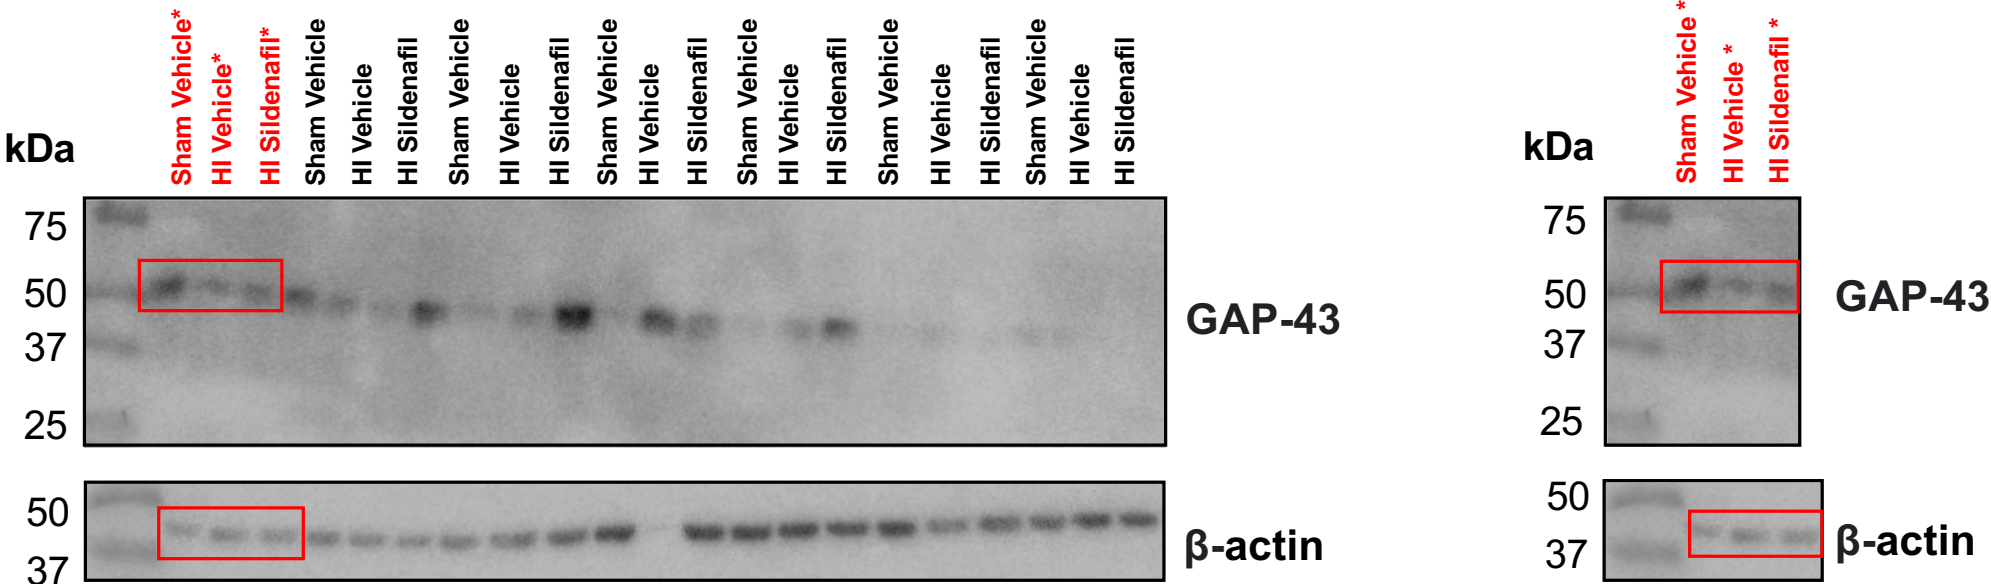

**FIGURE 3H – P30: Western blotting for GAP-43 at P30**, showing full-length western blots (on left panel) and representative samples chosen to be cropped for main Figure 3 (on right panel). The regions of the original blots used in main figure have been denoted using red boxes.



pAKT

**P12**

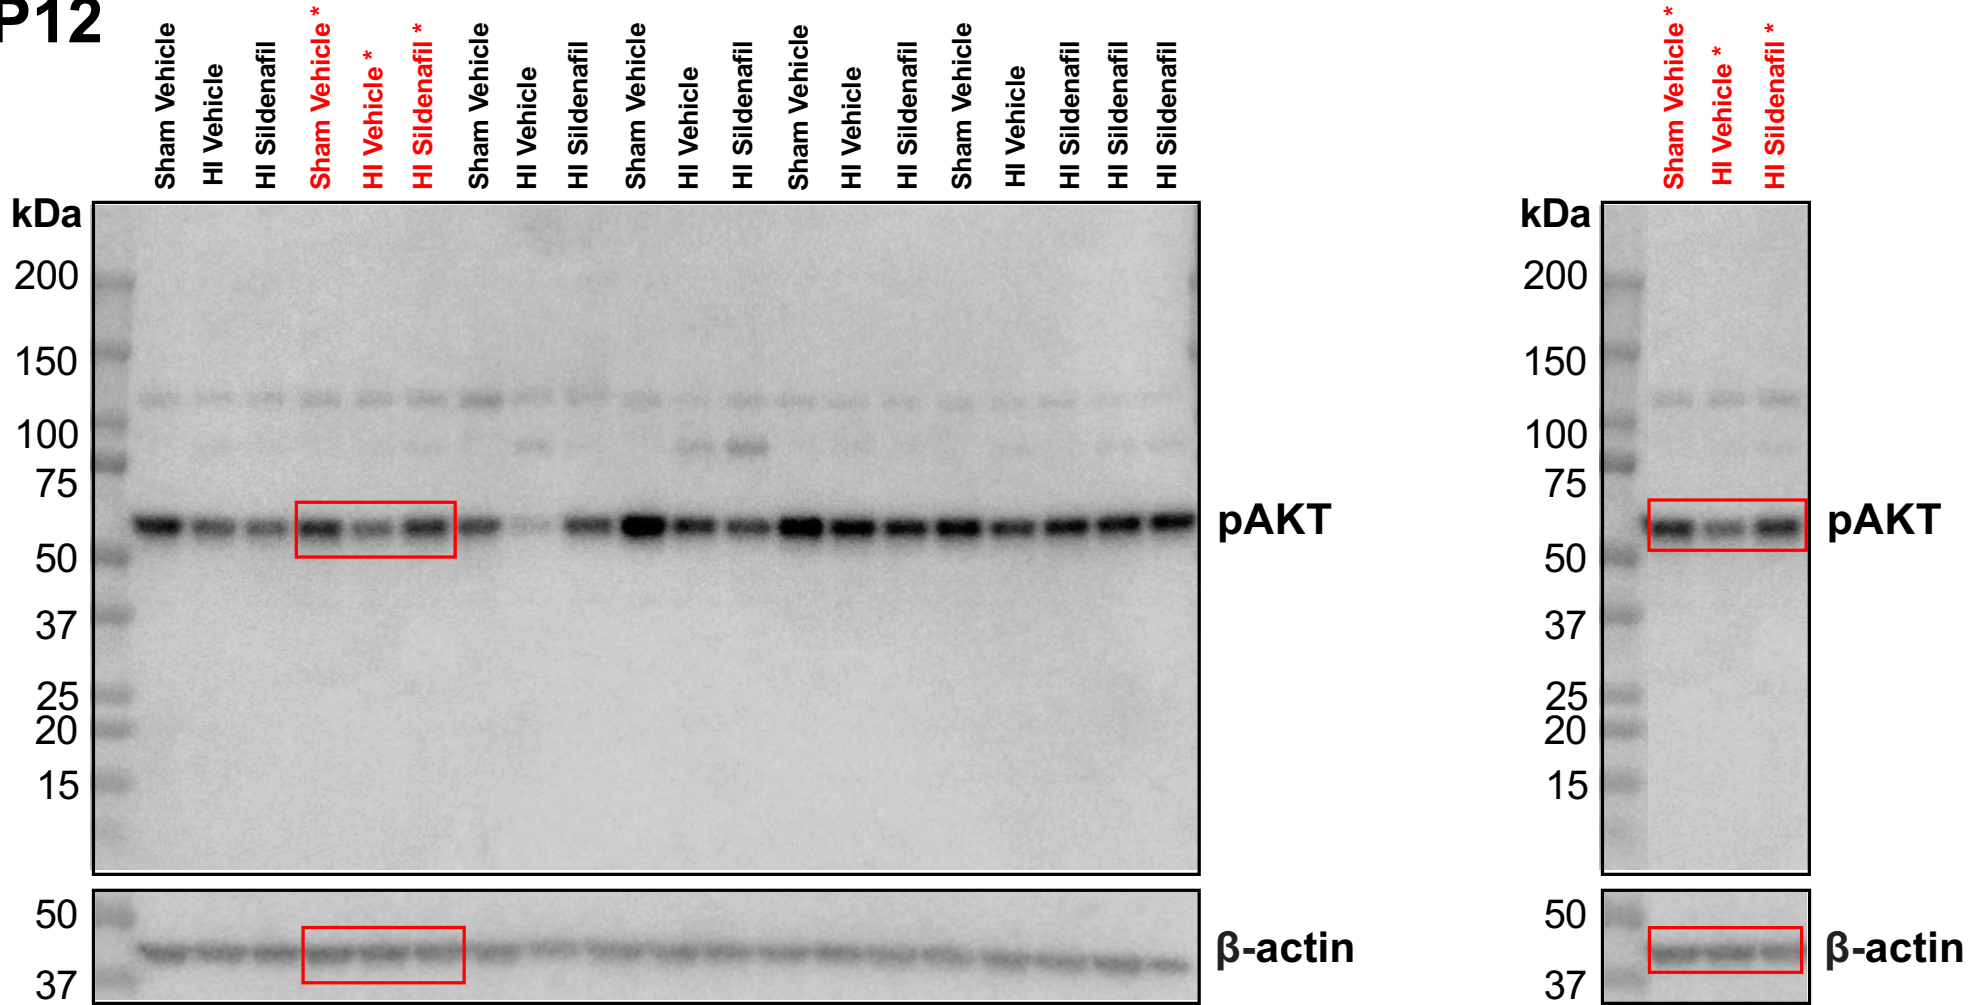

**FIGURE 6A – P12: Western blotting for pAKT at P12, showing full-length western blots (on left panel) and representative samples chosen to be cropped for main Figure 3 (on right panel). The regions of the original blots used in main figure have been denoted using red boxes.**

# P17

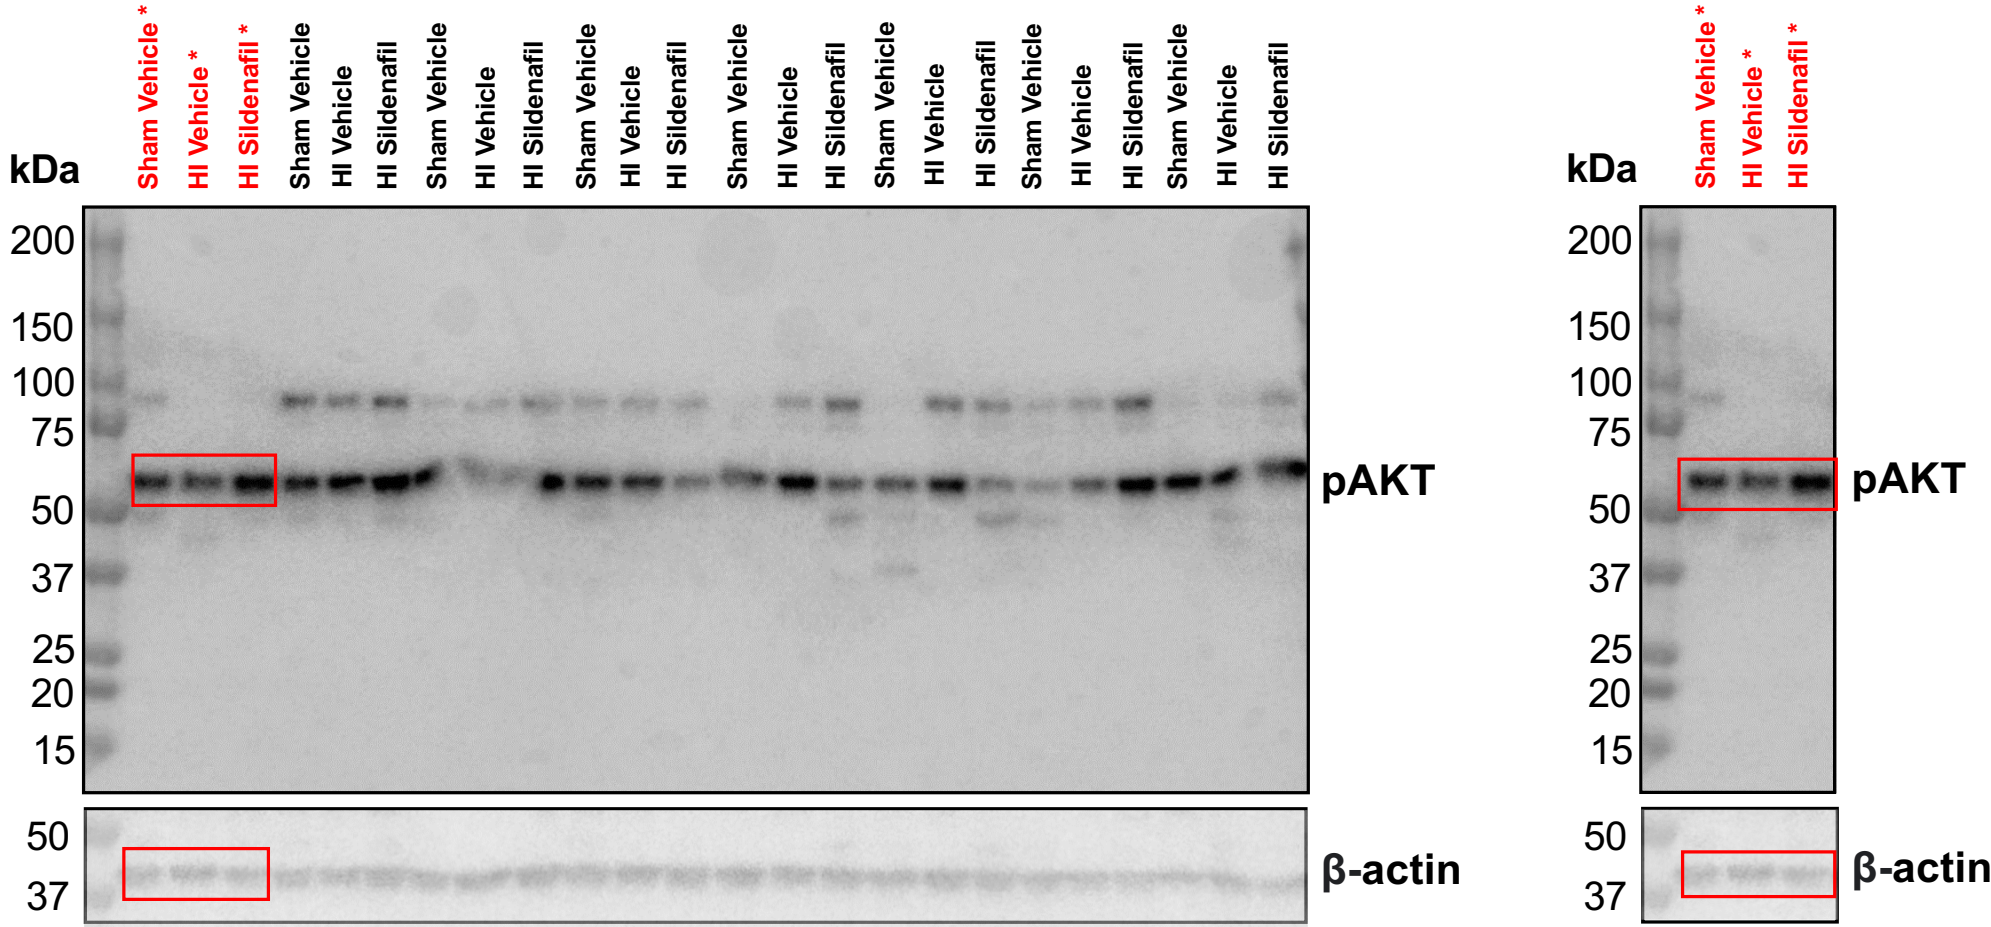

**FIGURE 6A – P17: Western blotting for pAKT at P17, showing full-length western blots (on left panel) and representative samples chosen to be cropped for main Figure 3 (on right panel). The regions of the original blots used in main figure have been denoted using red boxes.**

# P30

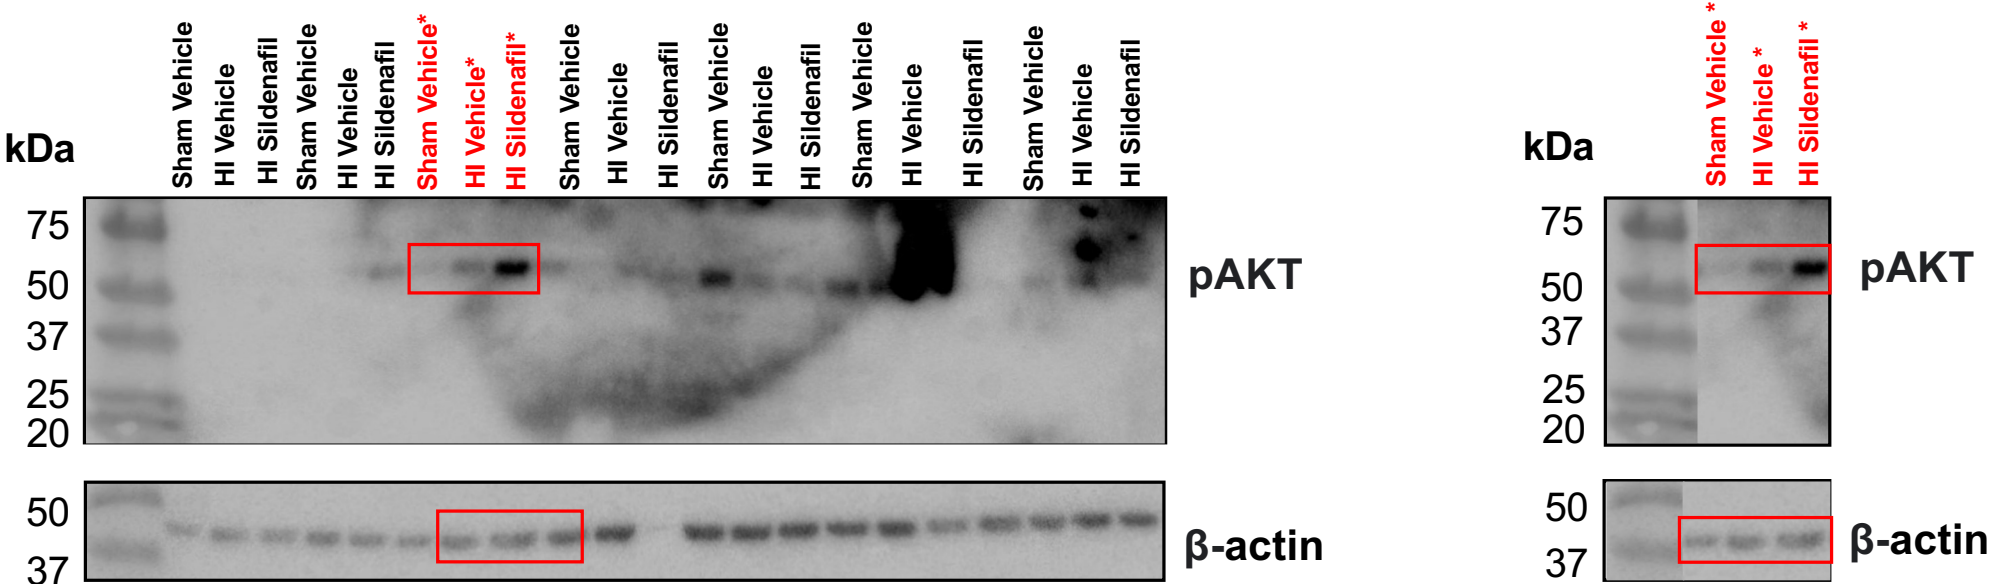

**FIGURE 6A – P30: Western blotting for pAKT at P30**, showing full-length western blots (on left panel) and representative samples chosen to be cropped for main Figure 3 (on right panel). The regions of the original blots used in main figure have been denoted using red boxes.

mTOR2481

**P12**

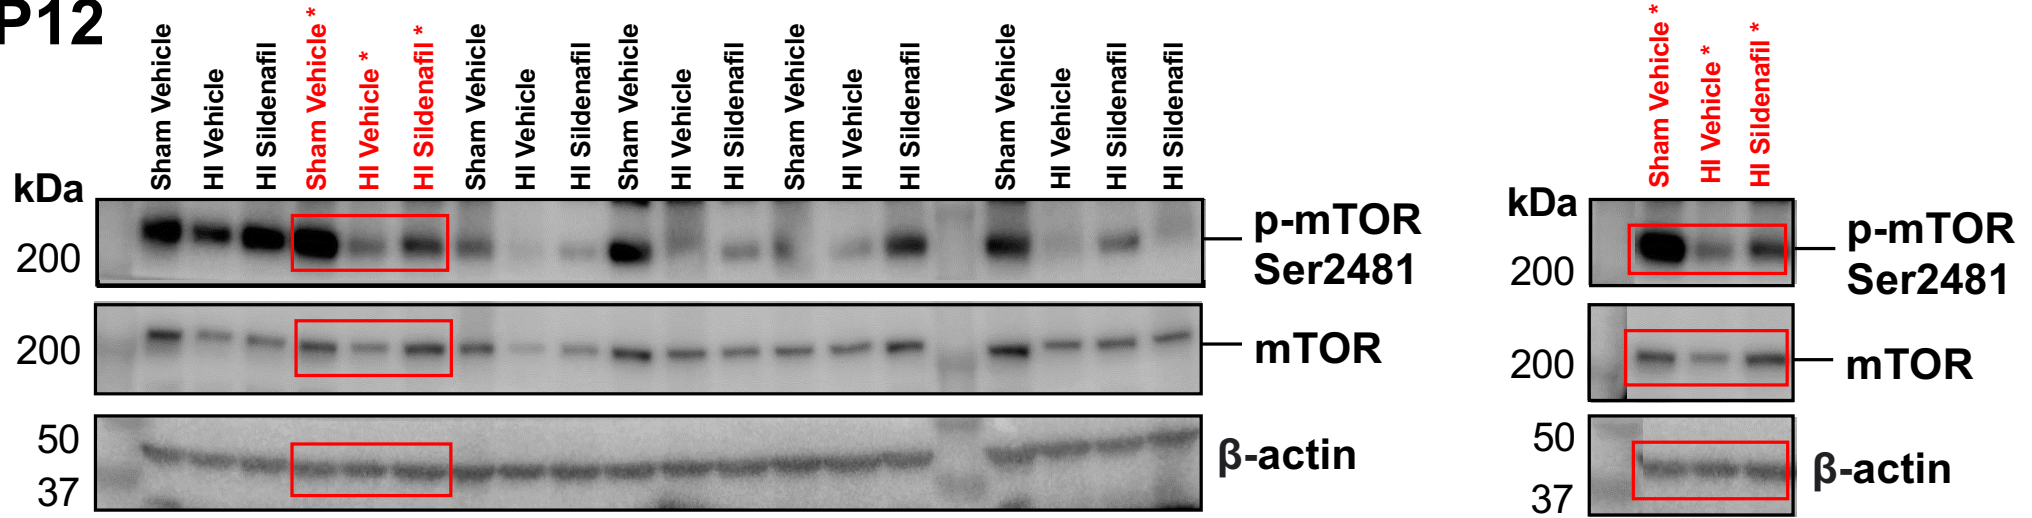

**FIGURE 6B – P12: Western blotting for mTOR Ser 2481 at P12, showing full-length western blots (on left panel) and representative samples chosen to be cropped for main Figure 3 (on right panel). The regions of the original blots used in main figure have been denoted using red boxes.**

**P17**

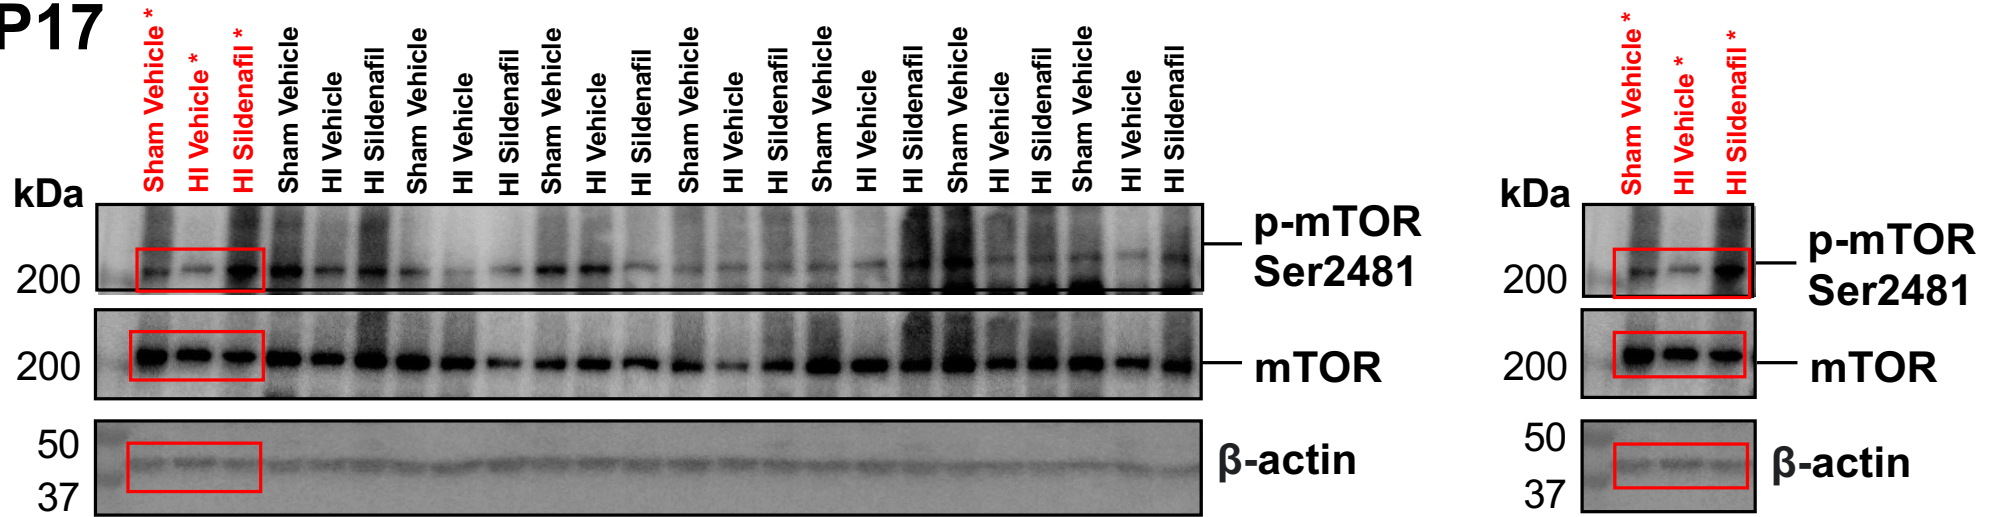

**FIGURE 6B – P17: Western blotting for mTOR Ser 2481 at P17, showing full-length western blots (on left panel) and representative samples chosen to be cropped for main Figure 3 (on right panel). The regions of the original blots used in main figure have been denoted using red boxes.**

# P30

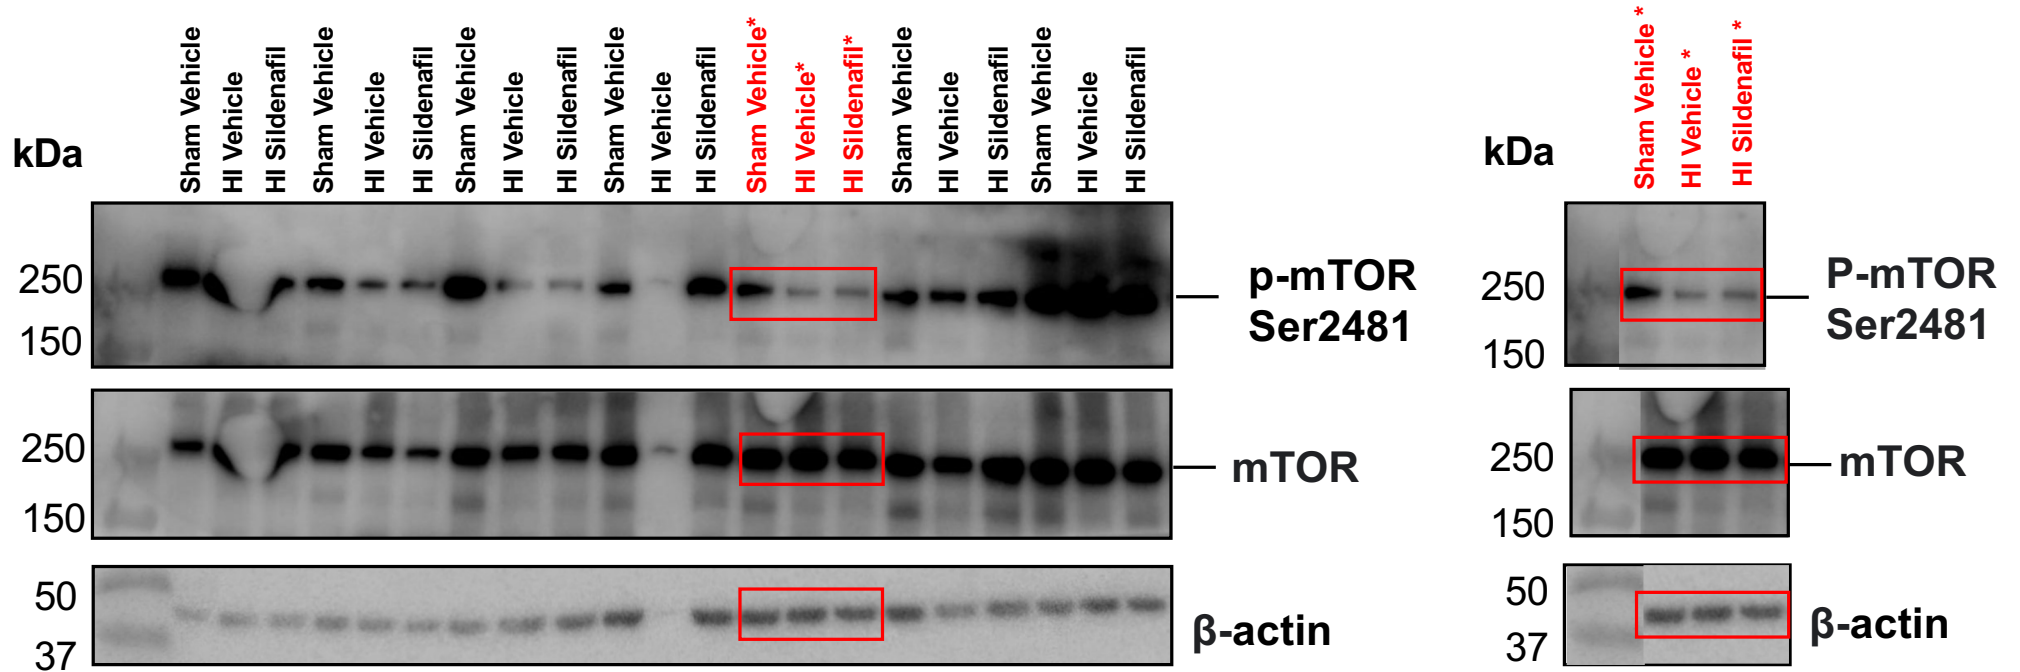

**FIGURE 6B – P30: Western blotting for mTOR Ser 2481 at P30, showing full-length western blots (on left panel) and representative samples chosen to be cropped for main Figure 3 (on right panel). The regions of the original blots used in main figure have been denoted using red boxes.**



mTOR 2448

**P12**

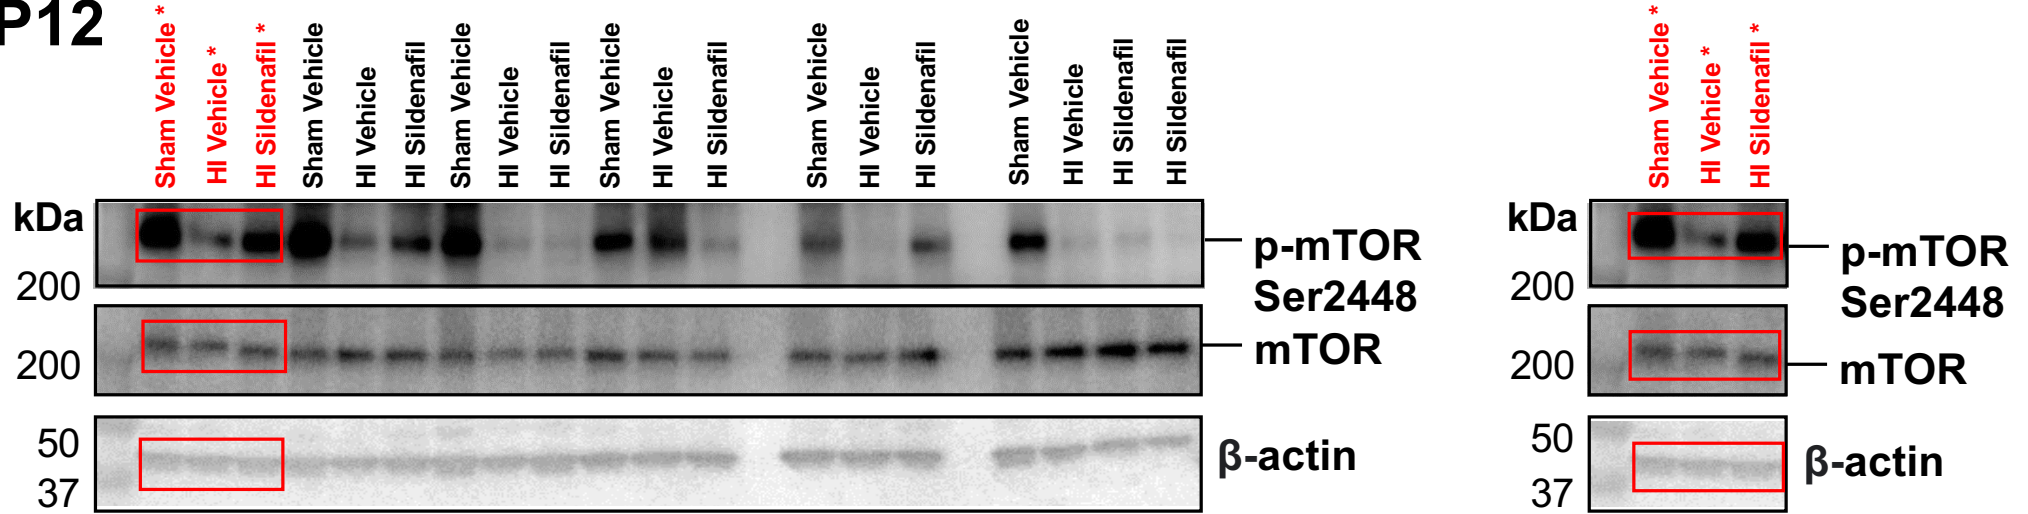

**FIGURE 6C – P12: Western blotting for mTOR Ser 2448 at P12, showing full-length western blots (on left panel) and representative samples chosen to be cropped for main Figure 3 (on right panel). The regions of the original blots used in main figure have been denoted using red boxes.**

**P17**

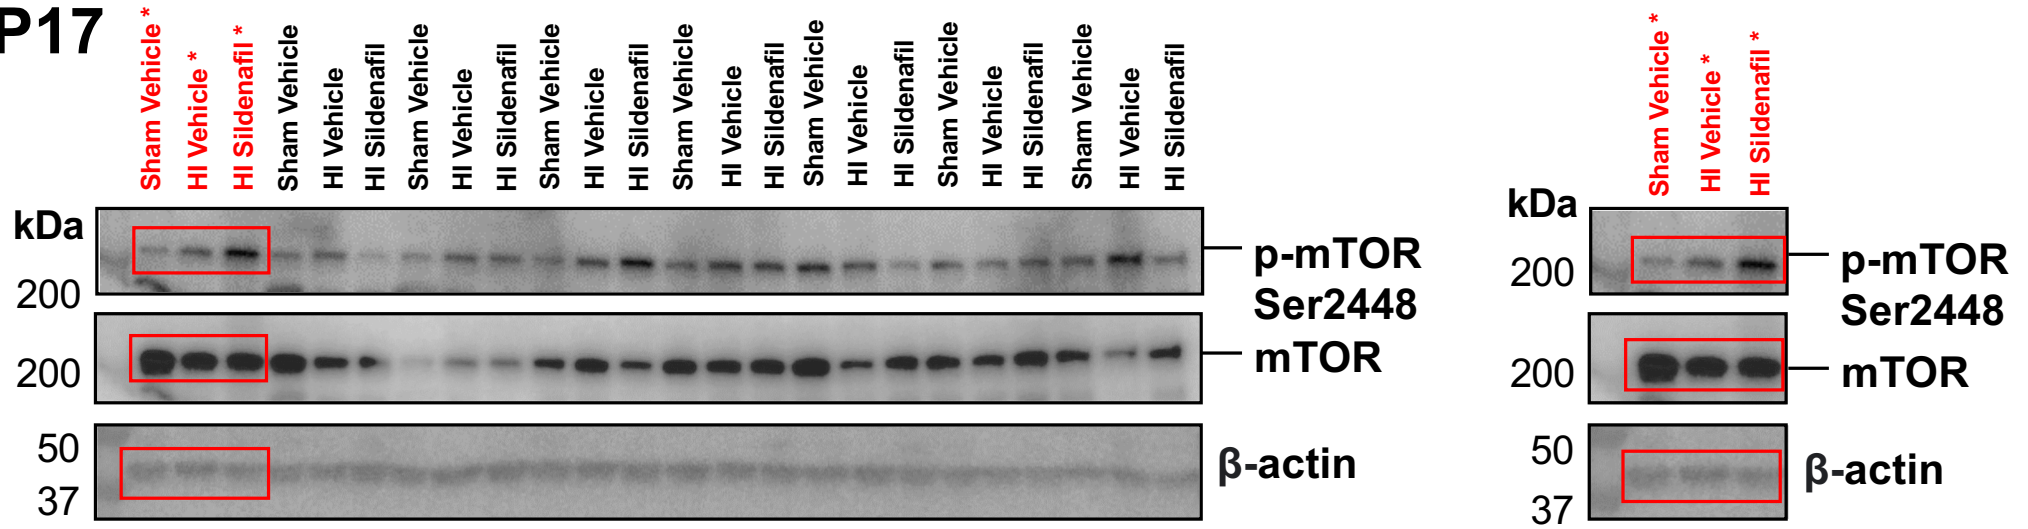

**FIGURE 6C – P17: Western blotting for mTOR Ser 2448 at P17, showing full-length western blots (on left panel) and representative samples chosen to be cropped for main Figure 3 (on right panel). The regions of the original blots used in main figure have been denoted using red boxes.**

# P30

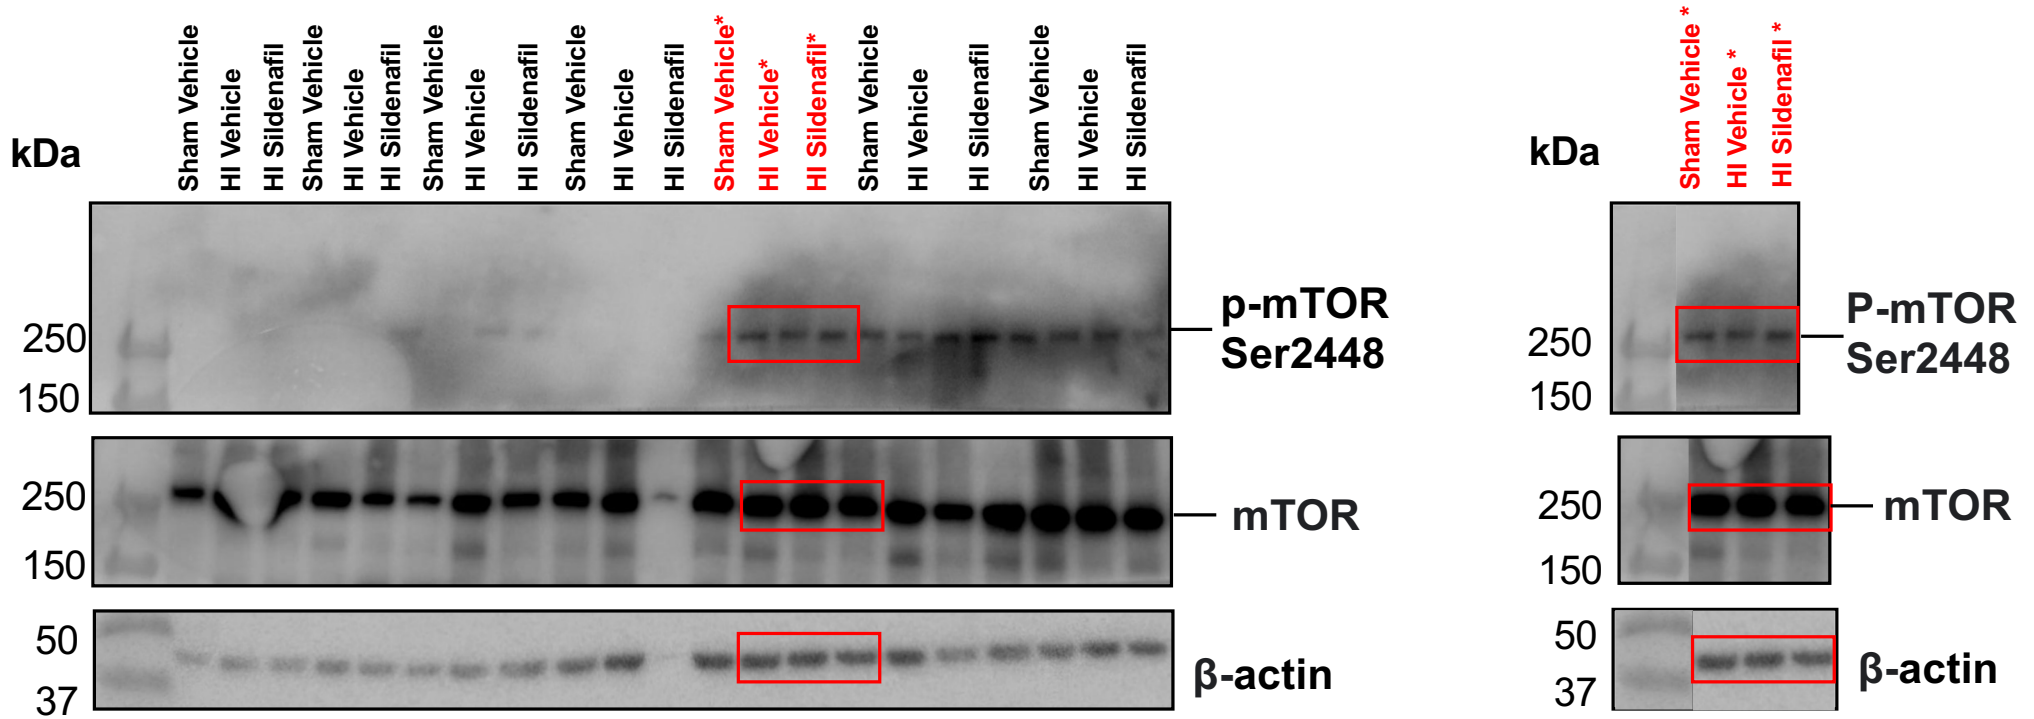

**FIGURE 6C – P30: Western blotting for mTOR Ser 2448 at P30**, showing full-length western blots (on left panel) and representative samples chosen to be cropped for main Figure 3 (on right panel). The regions of the original blots used in main figure have been denoted using red boxes.
